# Supplementary material for: Comprehensive prognostic and immunological analysis of Ubiquitin Specific Peptidase 28 in pan-cancers and identification of its role in hepatocellular carcinoma cell lines
Source: publisher site journal article supplement (doi:10.18632/aging.204869), 2023-07-13
Supplement: Supplementary file [file aging-v15i13-204869-supplementary-material-SD2.pdf]

## SUPPLEMENTARY TABLE

**Supplementary Table 1. Abbreviations of cancers in the TCGA-pan-cancer cohort.**

| <b>Abbreviation</b> | <b>Unabbreviated form</b>                                        |
|---------------------|------------------------------------------------------------------|
| ACC                 | Adrenocortical carcinoma                                         |
| AML                 | Acute Myeloid Leukemia                                           |
| BLCA                | Bladder Urothelial Carcinoma                                     |
| BRCA                | Breast invasive carcinoma                                        |
| CESC                | Cervical squamous cell carcinoma and endocervical adenocarcinoma |
| CHOL                | Cholangiocarcinoma                                               |
| COAD                | Colon adenocarcinoma                                             |
| DLBC                | Lymphoid Neoplasm Diffuse Large B-cell Lymphoma                  |
| ESCA                | Esophageal carcinoma                                             |
| GBM                 | Glioblastoma multiforme                                          |
| HNSC                | Head and Neck squamous cell carcinoma                            |
| KICH                | Kidney Chromophobe                                               |
| KIRC                | Kidney renal clear cell carcinoma                                |
| KIRP                | Kidney renal papillary cell carcinoma                            |
| LAML                | Acute Myeloid Leukemia                                           |
| LGG                 | Brain Lower Grade Glioma                                         |
| LIHC                | Liver hepatocellular carcinoma                                   |
| LUAD                | Lung adenocarcinoma                                              |
| LUSC                | Lung squamous cell carcinoma                                     |
| MESO                | Mesothelioma                                                     |
| OV                  | Ovarian serous cystadenocarcinoma                                |
| PAAD                | Pancreatic adenocarcinoma                                        |
| PPGL                | Pheochromocytoma and Paraganglioma                               |
| PRAD                | Prostate adenocarcinoma                                          |
| READ                | Rectum adenocarcinoma                                            |
| SARC                | Sarcoma                                                          |
| SKCM                | Skin Cutaneous Melanoma                                          |
| STAD                | Stomach adenocarcinoma                                           |
| TGCT                | Testicular Germ Cell Tumors                                      |
| THCA                | Thyroid carcinoma                                                |
| THYM                | Thymoma                                                          |
| UCEC                | Uterine Corpus Endometrial Carcinoma                             |
| UCS                 | Uterine Carcinosarcoma                                           |
| UVM                 | Uveal Melanoma                                                   |
