# Supplementary material for: Comprehensive prognostic and immunological analysis of Ubiquitin Specific Peptidase 28 in pan-cancers and identification of its role in hepatocellular carcinoma cell lines
Source: Aging (Albany NY). 2023 Jul 13;15(13):6545–76. doi: 10.18632/aging.204869 (PMC10373984; doi:10.18632/aging.204869)
Supplement: Supplementary Table 3 [file aging-15-204869-s004.xlsx]

## Sheet: Sheet1
Supplementary Table 3. The differentially expressed genes (DEGs) in each cancer type are presented.
Term	NES	FDR	Tumor
HALLMARK_OXIDATIVE_PHOSPHORYLATION	-2.29003	5e-09	ACC
HALLMARK_G2M_CHECKPOINT	2.05198	2.10129e-08	ACC
HALLMARK_TNFA_SIGNALING_VIA_NFKB	1.89816	1.3748e-06	ACC
HALLMARK_E2F_TARGETS	1.85448	4.38105e-06	ACC
HALLMARK_MITOTIC_SPINDLE	1.76956	2.58642e-05	ACC
HALLMARK_FATTY_ACID_METABOLISM	-1.87582	2.7737e-05	ACC
HALLMARK_BILE_ACID_METABOLISM	-1.96721	4.56623e-05	ACC
HALLMARK_ADIPOGENESIS	-1.66861	0.00040645	ACC
HALLMARK_PEROXISOME	-1.77771	0.00101303	ACC
HALLMARK_CHOLESTEROL_HOMEOSTASIS	-1.7384	0.00240747	ACC
HALLMARK_KRAS_SIGNALING_DN	1.53447	0.00562686	ACC
HALLMARK_APOPTOSIS	1.48412	0.00935846	ACC
HALLMARK_ESTROGEN_RESPONSE_EARLY	1.45074	0.0131076	ACC
HALLMARK_ALLOGRAFT_REJECTION	1.41775	0.0142443	ACC
HALLMARK_INFLAMMATORY_RESPONSE	1.41504	0.0142443	ACC
HALLMARK_COMPLEMENT	1.37637	0.0248551	ACC
HALLMARK_IL2_STAT5_SIGNALING	1.34556	0.0337787	ACC
HALLMARK_TGF_BETA_SIGNALING	1.51889	0.0514906	ACC
HALLMARK_HYPOXIA	1.3351	0.0541823	ACC
HALLMARK_XENOBIOTIC_METABOLISM	-1.24619	0.0970915	ACC
HALLMARK_SPERMATOGENESIS	1.22733	0.233773	ACC
HALLMARK_KRAS_SIGNALING_UP	1.20444	0.233773	ACC
HALLMARK_COAGULATION	1.21794	0.233773	ACC
HALLMARK_EPITHELIAL_MESENCHYMAL_TRANSITION	1.18824	0.233773	ACC
HALLMARK_ESTROGEN_RESPONSE_LATE	1.172	0.247525	ACC
HALLMARK_IL6_JAK_STAT3_SIGNALING	1.20608	0.306909	ACC
HALLMARK_INTERFERON_GAMMA_RESPONSE	1.13531	0.320865	ACC
HALLMARK_PI3K_AKT_MTOR_SIGNALING	1.14898	0.333969	ACC
HALLMARK_ANGIOGENESIS	-1.20135	0.333969	ACC
HALLMARK_REACTIVE_OXYGEN_SPECIES_PATHWAY	-1.18296	0.333969	ACC
HALLMARK_APICAL_JUNCTION	1.1176	0.333969	ACC
HALLMARK_UV_RESPONSE_UP	-1.10576	0.333969	ACC
HALLMARK_APICAL_SURFACE	-1.13503	0.371838	ACC
HALLMARK_MYOGENESIS	1.08409	0.39055	ACC
HALLMARK_INTERFERON_ALPHA_RESPONSE	-1.08945	0.407194	ACC
HALLMARK_GLYCOLYSIS	1.05616	0.440044	ACC
HALLMARK_PANCREAS_BETA_CELLS	-1.04016	0.537434	ACC
HALLMARK_UV_RESPONSE_DN	1.01485	0.551209	ACC
HALLMARK_P53_PATHWAY	-0.979799	0.624504	ACC
HALLMARK_ANDROGEN_RESPONSE	-0.979482	0.657583	ACC
HALLMARK_HEDGEHOG_SIGNALING	-0.931035	0.715372	ACC
HALLMARK_UNFOLDED_PROTEIN_RESPONSE	0.925133	0.729264	ACC
HALLMARK_PROTEIN_SECRETION	0.924658	0.729264	ACC
HALLMARK_MTORC1_SIGNALING	-0.940933	0.729264	ACC
HALLMARK_NOTCH_SIGNALING	0.866784	0.734091	ACC
HALLMARK_DNA_REPAIR	-0.894112	0.809889	ACC
HALLMARK_WNT_BETA_CATENIN_SIGNALING	0.78303	0.898429	ACC
HALLMARK_HEME_METABOLISM	-0.823809	0.971864	ACC
HALLMARK_MYC_TARGETS_V2	-0.681554	0.979302	ACC
HALLMARK_MYC_TARGETS_V1	0.745298	0.986907	ACC
HALLMARK_E2F_TARGETS	2.56544	1.25e-09	BLCA
HALLMARK_EPITHELIAL_MESENCHYMAL_TRANSITION	-2.38609	1.25e-09	BLCA
HALLMARK_G2M_CHECKPOINT	2.52825	1.25e-09	BLCA
HALLMARK_MITOTIC_SPINDLE	2.26806	1.25e-09	BLCA
HALLMARK_MYOGENESIS	-2.13397	1.89544e-09	BLCA
HALLMARK_OXIDATIVE_PHOSPHORYLATION	-1.77071	5.3795e-05	BLCA
HALLMARK_COAGULATION	-1.74025	0.000813062	BLCA
HALLMARK_ADIPOGENESIS	-1.58163	0.00259386	BLCA
HALLMARK_ALLOGRAFT_REJECTION	-1.52453	0.00530331	BLCA
HALLMARK_TNFA_SIGNALING_VIA_NFKB	-1.50547	0.0058893	BLCA
HALLMARK_KRAS_SIGNALING_DN	1.52786	0.0058893	BLCA
HALLMARK_SPERMATOGENESIS	1.52539	0.00757849	BLCA
HALLMARK_ANGIOGENESIS	-1.77136	0.00757849	BLCA
HALLMARK_KRAS_SIGNALING_UP	-1.47774	0.00878011	BLCA
HALLMARK_P53_PATHWAY	-1.43757	0.0118357	BLCA
HALLMARK_PROTEIN_SECRETION	1.51027	0.0266494	BLCA
HALLMARK_APICAL_JUNCTION	-1.38217	0.0284503	BLCA
HALLMARK_APOPTOSIS	-1.46488	0.0368869	BLCA
HALLMARK_XENOBIOTIC_METABOLISM	-1.32756	0.0502077	BLCA
HALLMARK_DNA_REPAIR	-1.34822	0.084924	BLCA
HALLMARK_HYPOXIA	-1.23602	0.105497	BLCA
HALLMARK_MTORC1_SIGNALING	1.27732	0.128788	BLCA
HALLMARK_ESTROGEN_RESPONSE_LATE	-1.22443	0.130244	BLCA
HALLMARK_UV_RESPONSE_UP	-1.30809	0.130955	BLCA
HALLMARK_IL2_STAT5_SIGNALING	-1.18325	0.148515	BLCA
HALLMARK_HEME_METABOLISM	1.23165	0.155753	BLCA
HALLMARK_INFLAMMATORY_RESPONSE	-1.16532	0.191732	BLCA
HALLMARK_HEDGEHOG_SIGNALING	1.30378	0.216744	BLCA
HALLMARK_FATTY_ACID_METABOLISM	-1.13168	0.311186	BLCA
HALLMARK_ANDROGEN_RESPONSE	1.13588	0.361305	BLCA
HALLMARK_CHOLESTEROL_HOMEOSTASIS	-1.11044	0.407056	BLCA
HALLMARK_COMPLEMENT	-1.07718	0.407056	BLCA
HALLMARK_ESTROGEN_RESPONSE_EARLY	-1.07527	0.407056	BLCA
HALLMARK_UV_RESPONSE_DN	1.08836	0.43357	BLCA
HALLMARK_INTERFERON_GAMMA_RESPONSE	-1.0572	0.440387	BLCA
HALLMARK_WNT_BETA_CATENIN_SIGNALING	1.07992	0.449495	BLCA
HALLMARK_IL6_JAK_STAT3_SIGNALING	-1.05122	0.475475	BLCA
HALLMARK_NOTCH_SIGNALING	-1.05145	0.480063	BLCA
HALLMARK_REACTIVE_OXYGEN_SPECIES_PATHWAY	-1.05648	0.480063	BLCA
HALLMARK_PI3K_AKT_MTOR_SIGNALING	1.02008	0.5142	BLCA
HALLMARK_BILE_ACID_METABOLISM	0.992902	0.544575	BLCA
HALLMARK_INTERFERON_ALPHA_RESPONSE	0.9977	0.545547	BLCA
HALLMARK_MYC_TARGETS_V2	-0.957093	0.653578	BLCA
HALLMARK_TGF_BETA_SIGNALING	-0.94335	0.658574	BLCA
HALLMARK_APICAL_SURFACE	-0.912973	0.688145	BLCA
HALLMARK_PANCREAS_BETA_CELLS	0.895827	0.688145	BLCA
HALLMARK_GLYCOLYSIS	-0.890621	0.829201	BLCA
HALLMARK_PEROXISOME	-0.852024	0.843023	BLCA
HALLMARK_MYC_TARGETS_V1	-0.711176	1	BLCA
HALLMARK_UNFOLDED_PROTEIN_RESPONSE	-0.635512	1	BLCA
HALLMARK_ALLOGRAFT_REJECTION	2.31309	1.66667e-09	BRCA
HALLMARK_INFLAMMATORY_RESPONSE	2.20964	1.66667e-09	BRCA
HALLMARK_OXIDATIVE_PHOSPHORYLATION	-2.25499	1.66667e-09	BRCA
HALLMARK_ESTROGEN_RESPONSE_EARLY	-2.09057	5.70245e-09	BRCA
HALLMARK_ESTROGEN_RESPONSE_LATE	-2.0117	2.94831e-08	BRCA
HALLMARK_INTERFERON_GAMMA_RESPONSE	1.97478	2.94831e-08	BRCA
HALLMARK_MITOTIC_SPINDLE	1.85603	1.11427e-06	BRCA
HALLMARK_IL6_JAK_STAT3_SIGNALING	2.02549	2.82169e-06	BRCA
HALLMARK_G2M_CHECKPOINT	1.82453	5.29607e-06	BRCA
HALLMARK_TNFA_SIGNALING_VIA_NFKB	1.78745	1.0919e-05	BRCA
HALLMARK_KRAS_SIGNALING_UP	1.77896	1.0919e-05	BRCA
HALLMARK_MYOGENESIS	-1.73461	3.02129e-05	BRCA
HALLMARK_ADIPOGENESIS	-1.72488	3.96843e-05	BRCA
HALLMARK_UV_RESPONSE_DN	1.71486	0.000218364	BRCA
HALLMARK_DNA_REPAIR	-1.72886	0.000231555	BRCA
HALLMARK_COMPLEMENT	1.66758	0.000304471	BRCA
HALLMARK_E2F_TARGETS	1.61974	0.000643919	BRCA
HALLMARK_IL2_STAT5_SIGNALING	1.48333	0.00424665	BRCA
HALLMARK_XENOBIOTIC_METABOLISM	-1.42439	0.00624222	BRCA
HALLMARK_FATTY_ACID_METABOLISM	-1.46843	0.00811718	BRCA
HALLMARK_EPITHELIAL_MESENCHYMAL_TRANSITION	1.42349	0.0110709	BRCA
HALLMARK_INTERFERON_ALPHA_RESPONSE	1.54991	0.0145656	BRCA
HALLMARK_PEROXISOME	-1.40204	0.0383714	BRCA
HALLMARK_SPERMATOGENESIS	1.33721	0.0792745	BRCA
HALLMARK_HEDGEHOG_SIGNALING	1.4616	0.083612	BRCA
HALLMARK_MYC_TARGETS_V2	-1.34494	0.116392	BRCA
HALLMARK_UV_RESPONSE_UP	-1.2204	0.144589	BRCA
HALLMARK_PI3K_AKT_MTOR_SIGNALING	1.2302	0.207772	BRCA
HALLMARK_PANCREAS_BETA_CELLS	-1.22899	0.232759	BRCA
HALLMARK_ANDROGEN_RESPONSE	1.20528	0.24147	BRCA
HALLMARK_KRAS_SIGNALING_DN	1.15678	0.256923	BRCA
HALLMARK_TGF_BETA_SIGNALING	1.15515	0.330882	BRCA
HALLMARK_APICAL_JUNCTION	1.11109	0.330882	BRCA
HALLMARK_BILE_ACID_METABOLISM	-1.11397	0.330882	BRCA
HALLMARK_PROTEIN_SECRETION	1.11627	0.374523	BRCA
HALLMARK_APICAL_SURFACE	1.07825	0.460637	BRCA
HALLMARK_HYPOXIA	1.03555	0.488702	BRCA
HALLMARK_WNT_BETA_CATENIN_SIGNALING	1.04846	0.492871	BRCA
HALLMARK_MTORC1_SIGNALING	1.01305	0.525155	BRCA
HALLMARK_NOTCH_SIGNALING	1.01452	0.536325	BRCA
HALLMARK_P53_PATHWAY	-0.996436	0.554324	BRCA
HALLMARK_REACTIVE_OXYGEN_SPECIES_PATHWAY	-0.952631	0.642386	BRCA
HALLMARK_GLYCOLYSIS	-0.968793	0.645185	BRCA
HALLMARK_COAGULATION	-0.963282	0.65169	BRCA
HALLMARK_ANGIOGENESIS	-0.905933	0.684321	BRCA
HALLMARK_HEME_METABOLISM	0.931375	0.684321	BRCA
HALLMARK_APOPTOSIS	0.923026	0.686036	BRCA
HALLMARK_CHOLESTEROL_HOMEOSTASIS	-0.85277	0.821366	BRCA
HALLMARK_UNFOLDED_PROTEIN_RESPONSE	-0.767481	0.964342	BRCA
HALLMARK_MYC_TARGETS_V1	-0.811843	0.972222	BRCA
HALLMARK_ALLOGRAFT_REJECTION	-2.38666	2.5e-09	CESC
HALLMARK_INTERFERON_GAMMA_RESPONSE	-2.41651	2.5e-09	CESC
HALLMARK_INTERFERON_ALPHA_RESPONSE	-2.32093	5.31194e-09	CESC
HALLMARK_MITOTIC_SPINDLE	2.01079	1.60354e-08	CESC
HALLMARK_P53_PATHWAY	-1.88626	1.55758e-06	CESC
HALLMARK_UV_RESPONSE_DN	1.82682	5.98789e-05	CESC
HALLMARK_COMPLEMENT	-1.71899	0.000135801	CESC
HALLMARK_OXIDATIVE_PHOSPHORYLATION	-1.72667	0.000256037	CESC
HALLMARK_INFLAMMATORY_RESPONSE	-1.65075	0.000322565	CESC
HALLMARK_G2M_CHECKPOINT	1.64518	0.000427267	CESC
HALLMARK_KRAS_SIGNALING_DN	-1.53534	0.00298756	CESC
HALLMARK_XENOBIOTIC_METABOLISM	-1.48929	0.00565403	CESC
HALLMARK_MYOGENESIS	-1.44161	0.00891172	CESC
HALLMARK_IL6_JAK_STAT3_SIGNALING	-1.58478	0.00891172	CESC
HALLMARK_IL2_STAT5_SIGNALING	-1.43478	0.0142264	CESC
HALLMARK_COAGULATION	-1.45376	0.0300935	CESC
HALLMARK_KRAS_SIGNALING_UP	-1.338	0.0316234	CESC
HALLMARK_PROTEIN_SECRETION	1.47574	0.0339608	CESC
HALLMARK_E2F_TARGETS	1.37578	0.0385147	CESC
HALLMARK_ADIPOGENESIS	-1.28776	0.0518366	CESC
HALLMARK_TNFA_SIGNALING_VIA_NFKB	-1.27563	0.0518366	CESC
HALLMARK_MYC_TARGETS_V1	-1.27093	0.0657422	CESC
HALLMARK_REACTIVE_OXYGEN_SPECIES_PATHWAY	-1.43916	0.132576	CESC
HALLMARK_HEDGEHOG_SIGNALING	1.39838	0.132576	CESC
HALLMARK_DNA_REPAIR	-1.25438	0.135831	CESC
HALLMARK_ANDROGEN_RESPONSE	1.3106	0.136874	CESC
HALLMARK_APOPTOSIS	-1.24282	0.140758	CESC
HALLMARK_UV_RESPONSE_UP	-1.23171	0.145948	CESC
HALLMARK_APICAL_SURFACE	-1.30746	0.155704	CESC
HALLMARK_ESTROGEN_RESPONSE_LATE	-1.15147	0.176519	CESC
HALLMARK_ESTROGEN_RESPONSE_EARLY	1.18475	0.186729	CESC
HALLMARK_TGF_BETA_SIGNALING	1.21996	0.225225	CESC
HALLMARK_WNT_BETA_CATENIN_SIGNALING	1.22838	0.258762	CESC
HALLMARK_SPERMATOGENESIS	1.15959	0.258762	CESC
HALLMARK_MYC_TARGETS_V2	-1.13618	0.328926	CESC
HALLMARK_EPITHELIAL_MESENCHYMAL_TRANSITION	1.06576	0.420875	CESC
HALLMARK_GLYCOLYSIS	1.05081	0.439869	CESC
HALLMARK_CHOLESTEROL_HOMEOSTASIS	-1.05943	0.447368	CESC
HALLMARK_FATTY_ACID_METABOLISM	-1.00758	0.58247	CESC
HALLMARK_HYPOXIA	-0.968387	0.660848	CESC
HALLMARK_BILE_ACID_METABOLISM	0.943364	0.695037	CESC
HALLMARK_PANCREAS_BETA_CELLS	0.917206	0.701034	CESC
HALLMARK_ANGIOGENESIS	-0.904316	0.733573	CESC
HALLMARK_APICAL_JUNCTION	-0.932989	0.740865	CESC
HALLMARK_HEME_METABOLISM	0.884107	0.848586	CESC
HALLMARK_NOTCH_SIGNALING	0.774703	0.880282	CESC
HALLMARK_PEROXISOME	0.823648	0.880282	CESC
HALLMARK_PI3K_AKT_MTOR_SIGNALING	-0.744756	1	CESC
HALLMARK_MTORC1_SIGNALING	0.682177	1	CESC
HALLMARK_UNFOLDED_PROTEIN_RESPONSE	0.584736	1	CESC
HALLMARK_OXIDATIVE_PHOSPHORYLATION	-2.41825	4.84728e-09	CHOL
HALLMARK_XENOBIOTIC_METABOLISM	-2.03386	4.84728e-09	CHOL
HALLMARK_ALLOGRAFT_REJECTION	1.91458	1.08424e-07	CHOL
HALLMARK_INFLAMMATORY_RESPONSE	1.78419	1.09774e-05	CHOL
HALLMARK_COAGULATION	-1.86353	2.81559e-05	CHOL
HALLMARK_TNFA_SIGNALING_VIA_NFKB	1.61963	0.00135244	CHOL
HALLMARK_IL6_JAK_STAT3_SIGNALING	1.66679	0.00430173	CHOL
HALLMARK_WNT_BETA_CATENIN_SIGNALING	1.73624	0.00654056	CHOL
HALLMARK_BILE_ACID_METABOLISM	-1.58206	0.00679742	CHOL
HALLMARK_DNA_REPAIR	-1.4769	0.0086987	CHOL
HALLMARK_ADIPOGENESIS	-1.3796	0.0086987	CHOL
HALLMARK_PEROXISOME	-1.57025	0.0097708	CHOL
HALLMARK_KRAS_SIGNALING_UP	1.48102	0.0097708	CHOL
HALLMARK_FATTY_ACID_METABOLISM	-1.41052	0.0113712	CHOL
HALLMARK_MYC_TARGETS_V1	-1.36988	0.0113712	CHOL
HALLMARK_UV_RESPONSE_DN	1.41733	0.0281408	CHOL
HALLMARK_EPITHELIAL_MESENCHYMAL_TRANSITION	1.3776	0.046331	CHOL
HALLMARK_IL2_STAT5_SIGNALING	1.33958	0.096972	CHOL
HALLMARK_COMPLEMENT	1.28469	0.143678	CHOL
HALLMARK_CHOLESTEROL_HOMEOSTASIS	-1.30132	0.143678	CHOL
HALLMARK_HYPOXIA	1.23629	0.212297	CHOL
HALLMARK_KRAS_SIGNALING_DN	1.21426	0.242318	CHOL
HALLMARK_INTERFERON_GAMMA_RESPONSE	1.21028	0.242318	CHOL
HALLMARK_HEDGEHOG_SIGNALING	1.31595	0.242318	CHOL
HALLMARK_APICAL_JUNCTION	1.20552	0.242318	CHOL
HALLMARK_TGF_BETA_SIGNALING	1.25141	0.242318	CHOL
HALLMARK_MITOTIC_SPINDLE	1.17764	0.267349	CHOL
HALLMARK_SPERMATOGENESIS	1.19247	0.267349	CHOL
HALLMARK_PANCREAS_BETA_CELLS	-1.20086	0.267349	CHOL
HALLMARK_ANGIOGENESIS	-1.2322	0.267349	CHOL
HALLMARK_ESTROGEN_RESPONSE_LATE	1.14305	0.306178	CHOL
HALLMARK_APICAL_SURFACE	1.12353	0.43845	CHOL
HALLMARK_REACTIVE_OXYGEN_SPECIES_PATHWAY	-1.10067	0.43845	CHOL
HALLMARK_NOTCH_SIGNALING	1.10447	0.43956	CHOL
HALLMARK_GLYCOLYSIS	-1.04368	0.43956	CHOL
HALLMARK_G2M_CHECKPOINT	1.05905	0.491404	CHOL
HALLMARK_APOPTOSIS	1.04185	0.502324	CHOL
HALLMARK_ESTROGEN_RESPONSE_EARLY	1.04309	0.502324	CHOL
HALLMARK_UV_RESPONSE_UP	1.03669	0.502324	CHOL
HALLMARK_ANDROGEN_RESPONSE	1.02945	0.508259	CHOL
HALLMARK_MYOGENESIS	1.02429	0.51932	CHOL
HALLMARK_P53_PATHWAY	0.874205	0.893529	CHOL
HALLMARK_UNFOLDED_PROTEIN_RESPONSE	-0.85987	0.998298	CHOL
HALLMARK_PI3K_AKT_MTOR_SIGNALING	0.761648	1	CHOL
HALLMARK_HEME_METABOLISM	0.778811	1	CHOL
HALLMARK_INTERFERON_ALPHA_RESPONSE	0.642012	1	CHOL
HALLMARK_MTORC1_SIGNALING	0.692322	1	CHOL
HALLMARK_MYC_TARGETS_V2	-0.676513	1	CHOL
HALLMARK_PROTEIN_SECRETION	0.57468	1	CHOL
HALLMARK_E2F_TARGETS	0.558885	1	CHOL
HALLMARK_ALLOGRAFT_REJECTION	2.46645	8.33333e-10	COAD
HALLMARK_E2F_TARGETS	2.71742	8.33333e-10	COAD
HALLMARK_G2M_CHECKPOINT	2.588	8.33333e-10	COAD
HALLMARK_INFLAMMATORY_RESPONSE	2.17541	8.33333e-10	COAD
HALLMARK_INTERFERON_GAMMA_RESPONSE	2.61212	8.33333e-10	COAD
HALLMARK_MYOGENESIS	-2.37638	8.33333e-10	COAD
HALLMARK_IL6_JAK_STAT3_SIGNALING	2.27185	7.29766e-08	COAD
HALLMARK_KRAS_SIGNALING_DN	-2.13451	1.68217e-07	COAD
HALLMARK_MITOTIC_SPINDLE	1.96266	2.56462e-07	COAD
HALLMARK_APICAL_JUNCTION	-1.99726	6.20941e-07	COAD
HALLMARK_INTERFERON_ALPHA_RESPONSE	2.17294	9.16796e-07	COAD
HALLMARK_P53_PATHWAY	-1.98415	1.287e-06	COAD
HALLMARK_ESTROGEN_RESPONSE_LATE	-1.87613	4.56236e-06	COAD
HALLMARK_ESTROGEN_RESPONSE_EARLY	-1.82697	2.70541e-05	COAD
HALLMARK_XENOBIOTIC_METABOLISM	-1.81062	4.80228e-05	COAD
HALLMARK_WNT_BETA_CATENIN_SIGNALING	-2.15957	5.70092e-05	COAD
HALLMARK_COAGULATION	-1.8379	0.000186418	COAD
HALLMARK_SPERMATOGENESIS	1.81367	0.000276764	COAD
HALLMARK_IL2_STAT5_SIGNALING	1.62126	0.00134659	COAD
HALLMARK_PEROXISOME	-1.71417	0.00134754	COAD
HALLMARK_PROTEIN_SECRETION	1.75471	0.00258855	COAD
HALLMARK_MTORC1_SIGNALING	1.57754	0.00292616	COAD
HALLMARK_EPITHELIAL_MESENCHYMAL_TRANSITION	-1.51989	0.0035511	COAD
HALLMARK_UV_RESPONSE_UP	-1.52757	0.00802959	COAD
HALLMARK_MYC_TARGETS_V1	1.40136	0.0251884	COAD
HALLMARK_TNFA_SIGNALING_VIA_NFKB	1.37189	0.0251884	COAD
HALLMARK_COMPLEMENT	1.42243	0.0264619	COAD
HALLMARK_ANDROGEN_RESPONSE	1.45957	0.0397882	COAD
HALLMARK_HYPOXIA	-1.31012	0.041752	COAD
HALLMARK_HEDGEHOG_SIGNALING	-1.44673	0.0469548	COAD
HALLMARK_KRAS_SIGNALING_UP	1.2128	0.160714	COAD
HALLMARK_TGF_BETA_SIGNALING	-1.26301	0.160714	COAD
HALLMARK_PI3K_AKT_MTOR_SIGNALING	1.22108	0.181069	COAD
HALLMARK_UV_RESPONSE_DN	1.19829	0.187273	COAD
HALLMARK_NOTCH_SIGNALING	-1.26898	0.193149	COAD
HALLMARK_FATTY_ACID_METABOLISM	-1.13237	0.228041	COAD
HALLMARK_CHOLESTEROL_HOMEOSTASIS	-1.18076	0.228041	COAD
HALLMARK_PANCREAS_BETA_CELLS	-1.22799	0.229118	COAD
HALLMARK_APICAL_SURFACE	-1.14658	0.30636	COAD
HALLMARK_OXIDATIVE_PHOSPHORYLATION	-1.06736	0.337553	COAD
HALLMARK_MYC_TARGETS_V2	1.10714	0.351323	COAD
HALLMARK_ADIPOGENESIS	-1.04901	0.357654	COAD
HALLMARK_APOPTOSIS	1.07191	0.362791	COAD
HALLMARK_BILE_ACID_METABOLISM	-1.0307	0.408249	COAD
HALLMARK_GLYCOLYSIS	0.983786	0.575499	COAD
HALLMARK_DNA_REPAIR	0.966124	0.594317	COAD
HALLMARK_REACTIVE_OXYGEN_SPECIES_PATHWAY	-0.867564	0.748512	COAD
HALLMARK_ANGIOGENESIS	0.809083	0.775885	COAD
HALLMARK_UNFOLDED_PROTEIN_RESPONSE	0.814408	0.876826	COAD
HALLMARK_HEME_METABOLISM	0.77502	0.930537	COAD
HALLMARK_MITOTIC_SPINDLE	2.32499	3.20069e-09	DLBC
HALLMARK_OXIDATIVE_PHOSPHORYLATION	-2.17232	3.20069e-09	DLBC
HALLMARK_G2M_CHECKPOINT	2.07713	3.42384e-09	DLBC
HALLMARK_UV_RESPONSE_DN	1.93618	7.35506e-06	DLBC
HALLMARK_MYOGENESIS	-1.62251	0.000367012	DLBC
HALLMARK_E2F_TARGETS	1.66895	0.000517468	DLBC
HALLMARK_DNA_REPAIR	-1.67833	0.000951594	DLBC
HALLMARK_ADIPOGENESIS	-1.56077	0.00197901	DLBC
HALLMARK_XENOBIOTIC_METABOLISM	-1.45449	0.00916808	DLBC
HALLMARK_MYC_TARGETS_V1	-1.47254	0.00999779	DLBC
HALLMARK_IL6_JAK_STAT3_SIGNALING	1.63388	0.0108925	DLBC
HALLMARK_ESTROGEN_RESPONSE_LATE	-1.41316	0.0114598	DLBC
HALLMARK_EPITHELIAL_MESENCHYMAL_TRANSITION	1.49026	0.0114598	DLBC
HALLMARK_TNFA_SIGNALING_VIA_NFKB	1.36607	0.0507226	DLBC
HALLMARK_TGF_BETA_SIGNALING	1.52289	0.0507226	DLBC
HALLMARK_FATTY_ACID_METABOLISM	-1.37389	0.0507226	DLBC
HALLMARK_INFLAMMATORY_RESPONSE	1.32991	0.0660861	DLBC
HALLMARK_COAGULATION	-1.33051	0.0660861	DLBC
HALLMARK_REACTIVE_OXYGEN_SPECIES_PATHWAY	-1.46377	0.0660861	DLBC
HALLMARK_HEDGEHOG_SIGNALING	1.44558	0.128645	DLBC
HALLMARK_PROTEIN_SECRETION	1.33697	0.138921	DLBC
HALLMARK_KRAS_SIGNALING_DN	-1.20974	0.171355	DLBC
HALLMARK_INTERFERON_GAMMA_RESPONSE	1.14327	0.363929	DLBC
HALLMARK_UV_RESPONSE_UP	-1.12743	0.373483	DLBC
HALLMARK_ALLOGRAFT_REJECTION	-1.09961	0.375	DLBC
HALLMARK_ESTROGEN_RESPONSE_EARLY	1.12712	0.380579	DLBC
HALLMARK_P53_PATHWAY	-1.09672	0.412782	DLBC
HALLMARK_HEME_METABOLISM	1.108	0.412782	DLBC
HALLMARK_ANDROGEN_RESPONSE	1.12239	0.412782	DLBC
HALLMARK_WNT_BETA_CATENIN_SIGNALING	1.1042	0.474957	DLBC
HALLMARK_PI3K_AKT_MTOR_SIGNALING	1.07811	0.491452	DLBC
HALLMARK_BILE_ACID_METABOLISM	-1.0419	0.527545	DLBC
HALLMARK_CHOLESTEROL_HOMEOSTASIS	-1.00961	0.60241	DLBC
HALLMARK_ANGIOGENESIS	1.0232	0.60241	DLBC
HALLMARK_KRAS_SIGNALING_UP	0.99903	0.636574	DLBC
HALLMARK_COMPLEMENT	-1.00356	0.636574	DLBC
HALLMARK_APICAL_SURFACE	-0.979559	0.657895	DLBC
HALLMARK_SPERMATOGENESIS	-0.986359	0.657895	DLBC
HALLMARK_NOTCH_SIGNALING	0.953224	0.673697	DLBC
HALLMARK_PEROXISOME	-0.907404	0.838072	DLBC
HALLMARK_APICAL_JUNCTION	0.90508	0.838072	DLBC
HALLMARK_MYC_TARGETS_V2	-0.883667	0.838072	DLBC
HALLMARK_MTORC1_SIGNALING	0.898474	0.845507	DLBC
HALLMARK_IL2_STAT5_SIGNALING	0.886369	0.845865	DLBC
HALLMARK_GLYCOLYSIS	-0.909656	0.846075	DLBC
HALLMARK_APOPTOSIS	0.854737	0.897117	DLBC
HALLMARK_HYPOXIA	0.826963	0.941245	DLBC
HALLMARK_UNFOLDED_PROTEIN_RESPONSE	0.786576	0.941245	DLBC
HALLMARK_INTERFERON_ALPHA_RESPONSE	-0.715301	0.990315	DLBC
HALLMARK_PANCREAS_BETA_CELLS	-0.591388	0.990315	DLBC
HALLMARK_E2F_TARGETS	2.83859	2.5e-09	ESCA
HALLMARK_G2M_CHECKPOINT	2.79243	2.5e-09	ESCA
HALLMARK_MITOTIC_SPINDLE	2.09845	3.68811e-09	ESCA
HALLMARK_KRAS_SIGNALING_UP	-2.09963	1.80158e-08	ESCA
HALLMARK_P53_PATHWAY	-2.08905	1.80158e-08	ESCA
HALLMARK_ESTROGEN_RESPONSE_LATE	-1.91873	2.12571e-06	ESCA
HALLMARK_INTERFERON_ALPHA_RESPONSE	-2.12995	3.30849e-06	ESCA
HALLMARK_TNFA_SIGNALING_VIA_NFKB	-1.88607	3.3562e-06	ESCA
HALLMARK_INTERFERON_GAMMA_RESPONSE	-1.8949	5.95055e-06	ESCA
HALLMARK_COMPLEMENT	-1.83588	1.51852e-05	ESCA
HALLMARK_XENOBIOTIC_METABOLISM	-1.76117	4.20183e-05	ESCA
HALLMARK_PANCREAS_BETA_CELLS	-2.13064	6.65107e-05	ESCA
HALLMARK_SPERMATOGENESIS	1.88088	7.26939e-05	ESCA
HALLMARK_COAGULATION	-1.81882	0.000152756	ESCA
HALLMARK_ESTROGEN_RESPONSE_EARLY	-1.67607	0.000198669	ESCA
HALLMARK_MYC_TARGETS_V1	1.58879	0.00090949	ESCA
HALLMARK_HYPOXIA	-1.59695	0.00090949	ESCA
HALLMARK_MYOGENESIS	-1.52209	0.00301455	ESCA
HALLMARK_MYC_TARGETS_V2	1.68603	0.00439668	ESCA
HALLMARK_INFLAMMATORY_RESPONSE	-1.38117	0.0202686	ESCA
HALLMARK_KRAS_SIGNALING_DN	-1.42397	0.0219366	ESCA
HALLMARK_FATTY_ACID_METABOLISM	-1.35878	0.0259802	ESCA
HALLMARK_REACTIVE_OXYGEN_SPECIES_PATHWAY	-1.52138	0.0278416	ESCA
HALLMARK_CHOLESTEROL_HOMEOSTASIS	-1.49401	0.0325559	ESCA
HALLMARK_MTORC1_SIGNALING	1.34844	0.0325559	ESCA
HALLMARK_GLYCOLYSIS	-1.31008	0.0398768	ESCA
HALLMARK_WNT_BETA_CATENIN_SIGNALING	1.36754	0.139373	ESCA
HALLMARK_OXIDATIVE_PHOSPHORYLATION	-1.2197	0.139373	ESCA
HALLMARK_ALLOGRAFT_REJECTION	-1.20468	0.153549	ESCA
HALLMARK_ADIPOGENESIS	-1.18924	0.172414	ESCA
HALLMARK_IL6_JAK_STAT3_SIGNALING	-1.21852	0.216319	ESCA
HALLMARK_HEDGEHOG_SIGNALING	1.25616	0.238254	ESCA
HALLMARK_BILE_ACID_METABOLISM	-1.14357	0.266742	ESCA
HALLMARK_APOPTOSIS	-1.13549	0.266742	ESCA
HALLMARK_TGF_BETA_SIGNALING	-1.1117	0.403014	ESCA
HALLMARK_APICAL_SURFACE	-1.08435	0.432028	ESCA
HALLMARK_APICAL_JUNCTION	-1.03787	0.4516	ESCA
HALLMARK_IL2_STAT5_SIGNALING	-1.02494	0.479995	ESCA
HALLMARK_NOTCH_SIGNALING	-1.05436	0.482143	ESCA
HALLMARK_UV_RESPONSE_UP	-1.01776	0.482143	ESCA
HALLMARK_HEME_METABOLISM	-0.99415	0.537412	ESCA
HALLMARK_ANGIOGENESIS	-0.986318	0.543536	ESCA
HALLMARK_DNA_REPAIR	0.942426	0.66919	ESCA
HALLMARK_ANDROGEN_RESPONSE	-0.930048	0.704491	ESCA
HALLMARK_EPITHELIAL_MESENCHYMAL_TRANSITION	0.852346	0.928962	ESCA
HALLMARK_PEROXISOME	0.785414	0.949067	ESCA
HALLMARK_PI3K_AKT_MTOR_SIGNALING	0.775425	0.949067	ESCA
HALLMARK_UV_RESPONSE_DN	0.787059	0.963017	ESCA
HALLMARK_PROTEIN_SECRETION	0.692023	0.990396	ESCA
HALLMARK_UNFOLDED_PROTEIN_RESPONSE	0.591683	1	ESCA
HALLMARK_ADIPOGENESIS	-2.29712	2.5e-10	GBM
HALLMARK_ALLOGRAFT_REJECTION	-3.09831	2.5e-10	GBM
HALLMARK_APOPTOSIS	-2.36394	2.5e-10	GBM
HALLMARK_COAGULATION	-2.46381	2.5e-10	GBM
HALLMARK_COMPLEMENT	-2.65028	2.5e-10	GBM
HALLMARK_E2F_TARGETS	2.8356	2.5e-10	GBM
HALLMARK_EPITHELIAL_MESENCHYMAL_TRANSITION	-2.70923	2.5e-10	GBM
HALLMARK_G2M_CHECKPOINT	2.9365	2.5e-10	GBM
HALLMARK_HYPOXIA	-2.10953	2.5e-10	GBM
HALLMARK_IL2_STAT5_SIGNALING	-2.4093	2.5e-10	GBM
HALLMARK_IL6_JAK_STAT3_SIGNALING	-2.64228	2.5e-10	GBM
HALLMARK_INFLAMMATORY_RESPONSE	-3.02247	2.5e-10	GBM
HALLMARK_INTERFERON_ALPHA_RESPONSE	-2.46356	2.5e-10	GBM
HALLMARK_INTERFERON_GAMMA_RESPONSE	-2.82468	2.5e-10	GBM
HALLMARK_KRAS_SIGNALING_UP	-2.47427	2.5e-10	GBM
HALLMARK_MITOTIC_SPINDLE	2.44256	2.5e-10	GBM
HALLMARK_OXIDATIVE_PHOSPHORYLATION	-2.46663	2.5e-10	GBM
HALLMARK_P53_PATHWAY	-2.43904	2.5e-10	GBM
HALLMARK_TNFA_SIGNALING_VIA_NFKB	-2.73094	2.5e-10	GBM
HALLMARK_XENOBIOTIC_METABOLISM	-2.18783	2.5e-10	GBM
HALLMARK_ESTROGEN_RESPONSE_LATE	-1.99627	9.63959e-09	GBM
HALLMARK_MYOGENESIS	-1.9891	1.05538e-08	GBM
HALLMARK_REACTIVE_OXYGEN_SPECIES_PATHWAY	-2.30163	1.18552e-07	GBM
HALLMARK_UV_RESPONSE_UP	-1.91005	1.0604e-06	GBM
HALLMARK_FATTY_ACID_METABOLISM	-1.88734	3.36672e-06	GBM
HALLMARK_ESTROGEN_RESPONSE_EARLY	-1.66619	8.5426e-05	GBM
HALLMARK_GLYCOLYSIS	-1.62766	0.000214432	GBM
HALLMARK_MTORC1_SIGNALING	-1.55603	0.000840315	GBM
HALLMARK_ANGIOGENESIS	-1.8467	0.00115412	GBM
HALLMARK_BILE_ACID_METABOLISM	-1.61337	0.00128973	GBM
HALLMARK_HEME_METABOLISM	-1.51228	0.00243499	GBM
HALLMARK_CHOLESTEROL_HOMEOSTASIS	-1.5686	0.00384049	GBM
HALLMARK_APICAL_JUNCTION	-1.34494	0.0307561	GBM
HALLMARK_ANDROGEN_RESPONSE	-1.38795	0.0375047	GBM
HALLMARK_PEROXISOME	-1.38856	0.0432375	GBM
HALLMARK_APICAL_SURFACE	-1.43995	0.0604183	GBM
HALLMARK_SPERMATOGENESIS	1.26505	0.0645954	GBM
HALLMARK_WNT_BETA_CATENIN_SIGNALING	1.38774	0.067051	GBM
HALLMARK_UV_RESPONSE_DN	-1.22741	0.115644	GBM
HALLMARK_HEDGEHOG_SIGNALING	1.29685	0.135369	GBM
HALLMARK_UNFOLDED_PROTEIN_RESPONSE	-1.17714	0.200604	GBM
HALLMARK_TGF_BETA_SIGNALING	-1.1699	0.24161	GBM
HALLMARK_NOTCH_SIGNALING	1.21238	0.24161	GBM
HALLMARK_PANCREAS_BETA_CELLS	1.15652	0.24161	GBM
HALLMARK_PI3K_AKT_MTOR_SIGNALING	-1.07348	0.343695	GBM
HALLMARK_DNA_REPAIR	-1.07077	0.343695	GBM
HALLMARK_KRAS_SIGNALING_DN	1.04225	0.358594	GBM
HALLMARK_PROTEIN_SECRETION	-1.04496	0.402194	GBM
HALLMARK_MYC_TARGETS_V2	0.959591	0.547904	GBM
HALLMARK_MYC_TARGETS_V1	-0.641428	1	GBM
HALLMARK_OXIDATIVE_PHOSPHORYLATION	-2.10784	1.36756e-08	HNSC
HALLMARK_MITOTIC_SPINDLE	1.96526	4.19182e-08	HNSC
HALLMARK_G2M_CHECKPOINT	1.84779	8.31705e-06	HNSC
HALLMARK_E2F_TARGETS	1.81136	1.32409e-05	HNSC
HALLMARK_MYOGENESIS	1.76391	1.78142e-05	HNSC
HALLMARK_P53_PATHWAY	-1.65623	0.000200175	HNSC
HALLMARK_DNA_REPAIR	-1.6629	0.00075789	HNSC
HALLMARK_MYC_TARGETS_V1	-1.46989	0.00659221	HNSC
HALLMARK_TNFA_SIGNALING_VIA_NFKB	-1.44107	0.00936997	HNSC
HALLMARK_HYPOXIA	-1.431	0.00936997	HNSC
HALLMARK_UV_RESPONSE_DN	1.51924	0.0121882	HNSC
HALLMARK_CHOLESTEROL_HOMEOSTASIS	-1.54774	0.0233081	HNSC
HALLMARK_UV_RESPONSE_UP	-1.41886	0.0233081	HNSC
HALLMARK_ALLOGRAFT_REJECTION	1.37618	0.0713833	HNSC
HALLMARK_HEDGEHOG_SIGNALING	1.54676	0.0723546	HNSC
HALLMARK_XENOBIOTIC_METABOLISM	-1.21377	0.0895259	HNSC
HALLMARK_COAGULATION	-1.33006	0.0932877	HNSC
HALLMARK_PANCREAS_BETA_CELLS	1.4216	0.111096	HNSC
HALLMARK_ANDROGEN_RESPONSE	1.36873	0.111096	HNSC
HALLMARK_UNFOLDED_PROTEIN_RESPONSE	-1.25256	0.143668	HNSC
HALLMARK_REACTIVE_OXYGEN_SPECIES_PATHWAY	-1.39734	0.176644	HNSC
HALLMARK_KRAS_SIGNALING_DN	1.24415	0.194068	HNSC
HALLMARK_GLYCOLYSIS	-1.14908	0.194068	HNSC
HALLMARK_INFLAMMATORY_RESPONSE	1.22635	0.194068	HNSC
HALLMARK_EPITHELIAL_MESENCHYMAL_TRANSITION	-1.11912	0.194068	HNSC
HALLMARK_IL2_STAT5_SIGNALING	1.21899	0.194068	HNSC
HALLMARK_APICAL_JUNCTION	1.21521	0.194068	HNSC
HALLMARK_SPERMATOGENESIS	1.23483	0.194068	HNSC
HALLMARK_ESTROGEN_RESPONSE_EARLY	1.20958	0.194068	HNSC
HALLMARK_KRAS_SIGNALING_UP	1.19786	0.212808	HNSC
HALLMARK_APICAL_SURFACE	-1.21892	0.214339	HNSC
HALLMARK_IL6_JAK_STAT3_SIGNALING	1.21358	0.235731	HNSC
HALLMARK_ADIPOGENESIS	-1.12276	0.241597	HNSC
HALLMARK_WNT_BETA_CATENIN_SIGNALING	1.24095	0.241597	HNSC
HALLMARK_MYC_TARGETS_V2	-1.15739	0.241597	HNSC
HALLMARK_BILE_ACID_METABOLISM	1.12678	0.349462	HNSC
HALLMARK_PROTEIN_SECRETION	1.12366	0.350417	HNSC
HALLMARK_APOPTOSIS	-1.02748	0.472521	HNSC
HALLMARK_INTERFERON_GAMMA_RESPONSE	0.991764	0.621418	HNSC
HALLMARK_PI3K_AKT_MTOR_SIGNALING	0.978044	0.625	HNSC
HALLMARK_FATTY_ACID_METABOLISM	-0.981813	0.659196	HNSC
HALLMARK_COMPLEMENT	0.940851	0.711435	HNSC
HALLMARK_HEME_METABOLISM	0.937287	0.711435	HNSC
HALLMARK_ESTROGEN_RESPONSE_LATE	0.901113	0.786096	HNSC
HALLMARK_TGF_BETA_SIGNALING	0.860123	0.813046	HNSC
HALLMARK_NOTCH_SIGNALING	-0.834482	0.831016	HNSC
HALLMARK_INTERFERON_ALPHA_RESPONSE	-0.87127	0.856859	HNSC
HALLMARK_PEROXISOME	0.781572	0.921369	HNSC
HALLMARK_ANGIOGENESIS	0.615922	0.999244	HNSC
HALLMARK_MTORC1_SIGNALING	0.642232	1	HNSC
HALLMARK_ANDROGEN_RESPONSE	1.88139	0.000662942	KICH
HALLMARK_PROTEIN_SECRETION	1.74233	0.00536922	KICH
HALLMARK_INFLAMMATORY_RESPONSE	1.58601	0.00837256	KICH
HALLMARK_ESTROGEN_RESPONSE_LATE	1.51127	0.0307721	KICH
HALLMARK_ESTROGEN_RESPONSE_EARLY	1.44225	0.0513507	KICH
HALLMARK_UV_RESPONSE_DN	1.42354	0.125609	KICH
HALLMARK_PANCREAS_BETA_CELLS	1.45711	0.226676	KICH
HALLMARK_SPERMATOGENESIS	1.35355	0.226676	KICH
HALLMARK_ALLOGRAFT_REJECTION	1.32205	0.226676	KICH
HALLMARK_KRAS_SIGNALING_DN	1.32691	0.226676	KICH
HALLMARK_BILE_ACID_METABOLISM	1.35411	0.226676	KICH
HALLMARK_KRAS_SIGNALING_UP	1.29396	0.232305	KICH
HALLMARK_COMPLEMENT	1.2749	0.246373	KICH
HALLMARK_G2M_CHECKPOINT	1.268	0.249661	KICH
HALLMARK_CHOLESTEROL_HOMEOSTASIS	1.29499	0.324525	KICH
HALLMARK_MYOGENESIS	-1.17774	0.334119	KICH
HALLMARK_MYC_TARGETS_V2	-1.21632	0.334119	KICH
HALLMARK_MTORC1_SIGNALING	1.20828	0.334119	KICH
HALLMARK_INTERFERON_ALPHA_RESPONSE	1.23456	0.337743	KICH
HALLMARK_INTERFERON_GAMMA_RESPONSE	1.1841	0.344118	KICH
HALLMARK_MITOTIC_SPINDLE	1.1778	0.347339	KICH
HALLMARK_E2F_TARGETS	1.16105	0.420078	KICH
HALLMARK_REACTIVE_OXYGEN_SPECIES_PATHWAY	-1.15248	0.429419	KICH
HALLMARK_HYPOXIA	1.13606	0.429419	KICH
HALLMARK_APICAL_JUNCTION	1.12597	0.429419	KICH
HALLMARK_IL2_STAT5_SIGNALING	1.11231	0.472215	KICH
HALLMARK_TGF_BETA_SIGNALING	1.12175	0.474971	KICH
HALLMARK_FATTY_ACID_METABOLISM	1.0815	0.548942	KICH
HALLMARK_XENOBIOTIC_METABOLISM	1.07059	0.552374	KICH
HALLMARK_APICAL_SURFACE	1.07805	0.564897	KICH
HALLMARK_HEME_METABOLISM	1.04498	0.564897	KICH
HALLMARK_HEDGEHOG_SIGNALING	0.992995	0.738507	KICH
HALLMARK_TNFA_SIGNALING_VIA_NFKB	0.976897	0.765808	KICH
HALLMARK_PEROXISOME	0.968559	0.765808	KICH
HALLMARK_IL6_JAK_STAT3_SIGNALING	0.94569	0.772655	KICH
HALLMARK_ANGIOGENESIS	-0.929943	0.772655	KICH
HALLMARK_GLYCOLYSIS	0.954428	0.772655	KICH
HALLMARK_COAGULATION	0.908364	0.846337	KICH
HALLMARK_EPITHELIAL_MESENCHYMAL_TRANSITION	0.911044	0.86039	KICH
HALLMARK_P53_PATHWAY	-0.939911	0.86039	KICH
HALLMARK_ADIPOGENESIS	0.885387	0.894213	KICH
HALLMARK_PI3K_AKT_MTOR_SIGNALING	0.848054	0.895602	KICH
HALLMARK_APOPTOSIS	0.843177	0.933928	KICH
HALLMARK_WNT_BETA_CATENIN_SIGNALING	-0.77644	0.983056	KICH
HALLMARK_NOTCH_SIGNALING	0.694047	0.983056	KICH
HALLMARK_UV_RESPONSE_UP	0.772254	0.983056	KICH
HALLMARK_UNFOLDED_PROTEIN_RESPONSE	-0.626149	1	KICH
HALLMARK_DNA_REPAIR	0.540947	1	KICH
HALLMARK_MYC_TARGETS_V1	0.540483	1	KICH
HALLMARK_OXIDATIVE_PHOSPHORYLATION	-0.747051	1	KICH
HALLMARK_XENOBIOTIC_METABOLISM	-2.09621	1.76971e-08	KIRC
HALLMARK_COAGULATION	-2.13408	1.03266e-07	KIRC
HALLMARK_OXIDATIVE_PHOSPHORYLATION	-1.94381	2.56281e-06	KIRC
HALLMARK_GLYCOLYSIS	-1.88622	2.56281e-06	KIRC
HALLMARK_P53_PATHWAY	-1.89731	5.55128e-06	KIRC
HALLMARK_MITOTIC_SPINDLE	1.81945	1.1275e-05	KIRC
HALLMARK_ADIPOGENESIS	-1.76343	3.39702e-05	KIRC
HALLMARK_ALLOGRAFT_REJECTION	-1.76162	6.42979e-05	KIRC
HALLMARK_HYPOXIA	-1.74724	0.000119574	KIRC
HALLMARK_G2M_CHECKPOINT	1.69948	0.000119574	KIRC
HALLMARK_FATTY_ACID_METABOLISM	-1.70221	0.000471823	KIRC
HALLMARK_DNA_REPAIR	-1.67883	0.000844329	KIRC
HALLMARK_REACTIVE_OXYGEN_SPECIES_PATHWAY	-1.89063	0.0010871	KIRC
HALLMARK_UV_RESPONSE_UP	-1.59468	0.00191824	KIRC
HALLMARK_ANDROGEN_RESPONSE	1.67185	0.00191824	KIRC
HALLMARK_INTERFERON_GAMMA_RESPONSE	-1.54418	0.00191824	KIRC
HALLMARK_TNFA_SIGNALING_VIA_NFKB	-1.54027	0.00191824	KIRC
HALLMARK_MYOGENESIS	-1.55806	0.00191824	KIRC
HALLMARK_UV_RESPONSE_DN	1.5711	0.00261772	KIRC
HALLMARK_EPITHELIAL_MESENCHYMAL_TRANSITION	-1.48012	0.00666346	KIRC
HALLMARK_APOPTOSIS	-1.45552	0.00950209	KIRC
HALLMARK_MYC_TARGETS_V1	-1.4683	0.00999	KIRC
HALLMARK_PROTEIN_SECRETION	1.47331	0.0158611	KIRC
HALLMARK_ESTROGEN_RESPONSE_LATE	-1.39604	0.0202216	KIRC
HALLMARK_MYC_TARGETS_V2	-1.50719	0.027616	KIRC
HALLMARK_INTERFERON_ALPHA_RESPONSE	-1.42543	0.0280137	KIRC
HALLMARK_E2F_TARGETS	1.2839	0.0342922	KIRC
HALLMARK_SPERMATOGENESIS	1.35044	0.0345026	KIRC
HALLMARK_PEROXISOME	-1.38471	0.0426829	KIRC
HALLMARK_COMPLEMENT	-1.30715	0.0536953	KIRC
HALLMARK_APICAL_JUNCTION	-1.27655	0.0596098	KIRC
HALLMARK_IL6_JAK_STAT3_SIGNALING	-1.34024	0.0807709	KIRC
HALLMARK_ANGIOGENESIS	-1.39074	0.102337	KIRC
HALLMARK_IL2_STAT5_SIGNALING	-1.21104	0.118041	KIRC
HALLMARK_CHOLESTEROL_HOMEOSTASIS	-1.25921	0.145929	KIRC
HALLMARK_BILE_ACID_METABOLISM	-1.15053	0.262701	KIRC
HALLMARK_INFLAMMATORY_RESPONSE	-1.13208	0.262701	KIRC
HALLMARK_ESTROGEN_RESPONSE_EARLY	-1.12264	0.263158	KIRC
HALLMARK_HEDGEHOG_SIGNALING	1.18013	0.279178	KIRC
HALLMARK_UNFOLDED_PROTEIN_RESPONSE	-1.12122	0.303163	KIRC
HALLMARK_PI3K_AKT_MTOR_SIGNALING	-1.04573	0.442288	KIRC
HALLMARK_PANCREAS_BETA_CELLS	-1.04312	0.470189	KIRC
HALLMARK_KRAS_SIGNALING_UP	-1.01394	0.470189	KIRC
HALLMARK_MTORC1_SIGNALING	-0.991431	0.524621	KIRC
HALLMARK_KRAS_SIGNALING_DN	-0.94324	0.686495	KIRC
HALLMARK_NOTCH_SIGNALING	-0.878767	0.719984	KIRC
HALLMARK_APICAL_SURFACE	-0.841261	0.791552	KIRC
HALLMARK_TGF_BETA_SIGNALING	0.831572	0.826389	KIRC
HALLMARK_HEME_METABOLISM	0.875903	0.828771	KIRC
HALLMARK_WNT_BETA_CATENIN_SIGNALING	-0.565881	0.992674	KIRC
HALLMARK_MITOTIC_SPINDLE	2.19186	1.66667e-09	KIRP
HALLMARK_OXIDATIVE_PHOSPHORYLATION	-2.65411	1.66667e-09	KIRP
HALLMARK_UV_RESPONSE_DN	2.24778	1.66667e-09	KIRP
HALLMARK_XENOBIOTIC_METABOLISM	-2.12815	1.95606e-09	KIRP
HALLMARK_G2M_CHECKPOINT	1.9554	2.05445e-07	KIRP
HALLMARK_ADIPOGENESIS	-1.84192	2.63608e-06	KIRP
HALLMARK_FATTY_ACID_METABOLISM	-1.93589	3.46073e-06	KIRP
HALLMARK_ALLOGRAFT_REJECTION	-1.73962	6.04075e-05	KIRP
HALLMARK_DNA_REPAIR	-1.77797	8.23782e-05	KIRP
HALLMARK_REACTIVE_OXYGEN_SPECIES_PATHWAY	-2.05919	9.00821e-05	KIRP
HALLMARK_COAGULATION	-1.79303	9.06367e-05	KIRP
HALLMARK_TGF_BETA_SIGNALING	1.77265	0.00289898	KIRP
HALLMARK_MYOGENESIS	-1.4912	0.00397054	KIRP
HALLMARK_E2F_TARGETS	1.43942	0.0115548	KIRP
HALLMARK_PROTEIN_SECRETION	1.54453	0.0128993	KIRP
HALLMARK_UV_RESPONSE_UP	-1.45333	0.0137059	KIRP
HALLMARK_P53_PATHWAY	-1.42035	0.0210048	KIRP
HALLMARK_MYC_TARGETS_V1	-1.39226	0.0248008	KIRP
HALLMARK_EPITHELIAL_MESENCHYMAL_TRANSITION	1.41846	0.0248008	KIRP
HALLMARK_PEROXISOME	-1.39218	0.0321478	KIRP
HALLMARK_ANDROGEN_RESPONSE	1.44204	0.0383228	KIRP
HALLMARK_PANCREAS_BETA_CELLS	-1.44341	0.0438036	KIRP
HALLMARK_HEDGEHOG_SIGNALING	1.54138	0.0502633	KIRP
HALLMARK_BILE_ACID_METABOLISM	-1.32678	0.0545447	KIRP
HALLMARK_COMPLEMENT	-1.27527	0.0611355	KIRP
HALLMARK_GLYCOLYSIS	-1.27145	0.0625666	KIRP
HALLMARK_MYC_TARGETS_V2	-1.38677	0.0726504	KIRP
HALLMARK_APICAL_JUNCTION	1.29371	0.0919681	KIRP
HALLMARK_KRAS_SIGNALING_UP	1.24751	0.12766	KIRP
HALLMARK_ESTROGEN_RESPONSE_EARLY	1.23519	0.12766	KIRP
HALLMARK_INTERFERON_GAMMA_RESPONSE	-1.1858	0.133704	KIRP
HALLMARK_ESTROGEN_RESPONSE_LATE	-1.1656	0.139127	KIRP
HALLMARK_NOTCH_SIGNALING	1.36349	0.143083	KIRP
HALLMARK_WNT_BETA_CATENIN_SIGNALING	1.23695	0.244292	KIRP
HALLMARK_INTERFERON_ALPHA_RESPONSE	-1.14524	0.251397	KIRP
HALLMARK_SPERMATOGENESIS	1.14566	0.269401	KIRP
HALLMARK_APOPTOSIS	-1.10821	0.269401	KIRP
HALLMARK_KRAS_SIGNALING_DN	1.08146	0.372994	KIRP
HALLMARK_CHOLESTEROL_HOMEOSTASIS	-0.980161	0.603519	KIRP
HALLMARK_APICAL_SURFACE	0.975406	0.603519	KIRP
HALLMARK_HYPOXIA	-0.982616	0.628486	KIRP
HALLMARK_IL6_JAK_STAT3_SIGNALING	-0.943057	0.7083	KIRP
HALLMARK_INFLAMMATORY_RESPONSE	0.927988	0.741584	KIRP
HALLMARK_PI3K_AKT_MTOR_SIGNALING	0.908368	0.745903	KIRP
HALLMARK_ANGIOGENESIS	0.861114	0.757741	KIRP
HALLMARK_HEME_METABOLISM	-0.900293	0.838403	KIRP
HALLMARK_IL2_STAT5_SIGNALING	0.841846	0.907071	KIRP
HALLMARK_TNFA_SIGNALING_VIA_NFKB	0.795817	0.97028	KIRP
HALLMARK_MTORC1_SIGNALING	-0.786769	0.985836	KIRP
HALLMARK_UNFOLDED_PROTEIN_RESPONSE	-0.715029	0.985836	KIRP
HALLMARK_EPITHELIAL_MESENCHYMAL_TRANSITION	2.05572	1.66667e-09	LAML
HALLMARK_KRAS_SIGNALING_UP	1.92276	1.66667e-09	LAML
HALLMARK_OXIDATIVE_PHOSPHORYLATION	-2.7324	1.66667e-09	LAML
HALLMARK_INFLAMMATORY_RESPONSE	1.76192	5.12625e-07	LAML
HALLMARK_HEME_METABOLISM	1.74826	1.51007e-06	LAML
HALLMARK_ALLOGRAFT_REJECTION	1.70919	2.90295e-06	LAML
HALLMARK_APICAL_JUNCTION	1.74961	2.90295e-06	LAML
HALLMARK_UV_RESPONSE_DN	1.76582	9.37478e-06	LAML
HALLMARK_DNA_REPAIR	-1.93311	1.21496e-05	LAML
HALLMARK_IL2_STAT5_SIGNALING	1.65011	1.91048e-05	LAML
HALLMARK_ESTROGEN_RESPONSE_EARLY	1.57259	0.00033224	LAML
HALLMARK_INTERFERON_ALPHA_RESPONSE	1.64295	0.00108405	LAML
HALLMARK_INTERFERON_GAMMA_RESPONSE	1.50054	0.0011962	LAML
HALLMARK_MYC_TARGETS_V1	-1.52544	0.00135923	LAML
HALLMARK_FATTY_ACID_METABOLISM	-1.59042	0.00212754	LAML
HALLMARK_ANGIOGENESIS	1.777	0.00214679	LAML
HALLMARK_COMPLEMENT	1.46271	0.00214679	LAML
HALLMARK_ESTROGEN_RESPONSE_LATE	1.42846	0.00373442	LAML
HALLMARK_MYOGENESIS	1.42574	0.00960671	LAML
HALLMARK_MITOTIC_SPINDLE	1.36555	0.0166521	LAML
HALLMARK_IL6_JAK_STAT3_SIGNALING	1.52547	0.0200012	LAML
HALLMARK_HEDGEHOG_SIGNALING	1.58534	0.0205778	LAML
HALLMARK_P53_PATHWAY	-1.28562	0.022531	LAML
HALLMARK_ANDROGEN_RESPONSE	1.42886	0.0357302	LAML
HALLMARK_MYC_TARGETS_V2	-1.39141	0.0454524	LAML
HALLMARK_APICAL_SURFACE	1.47796	0.0483006	LAML
HALLMARK_TGF_BETA_SIGNALING	1.43595	0.0592777	LAML
HALLMARK_WNT_BETA_CATENIN_SIGNALING	1.45626	0.0592777	LAML
HALLMARK_ADIPOGENESIS	-1.25018	0.0976642	LAML
HALLMARK_REACTIVE_OXYGEN_SPECIES_PATHWAY	-1.27743	0.216078	LAML
HALLMARK_PROTEIN_SECRETION	1.21702	0.230659	LAML
HALLMARK_COAGULATION	1.18623	0.257411	LAML
HALLMARK_NOTCH_SIGNALING	1.24069	0.266503	LAML
HALLMARK_APOPTOSIS	1.13511	0.330018	LAML
HALLMARK_BILE_ACID_METABOLISM	1.14632	0.330018	LAML
HALLMARK_KRAS_SIGNALING_DN	1.10861	0.393326	LAML
HALLMARK_PANCREAS_BETA_CELLS	1.13558	0.43449	LAML
HALLMARK_TNFA_SIGNALING_VIA_NFKB	0.968128	0.770867	LAML
HALLMARK_GLYCOLYSIS	0.949992	0.804042	LAML
HALLMARK_XENOBIOTIC_METABOLISM	0.934769	0.81422	LAML
HALLMARK_HYPOXIA	0.928791	0.829466	LAML
HALLMARK_G2M_CHECKPOINT	0.883775	0.905823	LAML
HALLMARK_UV_RESPONSE_UP	0.852694	0.918055	LAML
HALLMARK_MTORC1_SIGNALING	-0.782828	0.949488	LAML
HALLMARK_CHOLESTEROL_HOMEOSTASIS	0.765871	0.949488	LAML
HALLMARK_SPERMATOGENESIS	0.760192	0.949488	LAML
HALLMARK_PI3K_AKT_MTOR_SIGNALING	0.744821	0.949488	LAML
HALLMARK_PEROXISOME	0.68876	0.975459	LAML
HALLMARK_UNFOLDED_PROTEIN_RESPONSE	0.584018	0.996957	LAML
HALLMARK_E2F_TARGETS	0.586503	0.996957	LAML
HALLMARK_E2F_TARGETS	2.95025	1.25e-09	LGG
HALLMARK_G2M_CHECKPOINT	2.88806	1.25e-09	LGG
HALLMARK_MITOTIC_SPINDLE	2.23377	1.25e-09	LGG
HALLMARK_OXIDATIVE_PHOSPHORYLATION	-2.10922	1.25e-09	LGG
HALLMARK_MYOGENESIS	-1.87552	1.27024e-06	LGG
HALLMARK_KRAS_SIGNALING_DN	-1.83815	4.30133e-06	LGG
HALLMARK_IL6_JAK_STAT3_SIGNALING	1.85	0.000227019	LGG
HALLMARK_PANCREAS_BETA_CELLS	-1.94593	0.000259478	LGG
HALLMARK_ESTROGEN_RESPONSE_LATE	-1.5956	0.00156642	LGG
HALLMARK_FATTY_ACID_METABOLISM	-1.6257	0.00177474	LGG
HALLMARK_MYC_TARGETS_V1	1.50409	0.00177474	LGG
HALLMARK_INTERFERON_GAMMA_RESPONSE	1.4939	0.00212359	LGG
HALLMARK_ALLOGRAFT_REJECTION	1.42435	0.00867925	LGG
HALLMARK_ADIPOGENESIS	-1.47786	0.00931823	LGG
HALLMARK_EPITHELIAL_MESENCHYMAL_TRANSITION	1.33292	0.0185458	LGG
HALLMARK_ESTROGEN_RESPONSE_EARLY	-1.43069	0.0185458	LGG
HALLMARK_TGF_BETA_SIGNALING	1.53317	0.027977	LGG
HALLMARK_UV_RESPONSE_UP	-1.43081	0.027977	LGG
HALLMARK_XENOBIOTIC_METABOLISM	-1.34421	0.0354623	LGG
HALLMARK_REACTIVE_OXYGEN_SPECIES_PATHWAY	-1.59417	0.0359266	LGG
HALLMARK_CHOLESTEROL_HOMEOSTASIS	-1.49075	0.0359266	LGG
HALLMARK_TNFA_SIGNALING_VIA_NFKB	1.2063	0.0632126	LGG
HALLMARK_BILE_ACID_METABOLISM	-1.34864	0.080848	LGG
HALLMARK_P53_PATHWAY	-1.26409	0.1294	LGG
HALLMARK_INTERFERON_ALPHA_RESPONSE	1.25375	0.176678	LGG
HALLMARK_ANGIOGENESIS	1.28197	0.2358	LGG
HALLMARK_NOTCH_SIGNALING	1.29156	0.255076	LGG
HALLMARK_WNT_BETA_CATENIN_SIGNALING	1.22613	0.27551	LGG
HALLMARK_PEROXISOME	-1.17454	0.335445	LGG
HALLMARK_APICAL_JUNCTION	-1.13027	0.34688	LGG
HALLMARK_MYC_TARGETS_V2	1.13047	0.369624	LGG
HALLMARK_KRAS_SIGNALING_UP	-1.10787	0.386301	LGG
HALLMARK_APICAL_SURFACE	-1.14349	0.40738	LGG
HALLMARK_HYPOXIA	-1.08534	0.40738	LGG
HALLMARK_SPERMATOGENESIS	-1.10268	0.409789	LGG
HALLMARK_HEDGEHOG_SIGNALING	-1.0404	0.573192	LGG
HALLMARK_HEME_METABOLISM	-1.01011	0.609367	LGG
HALLMARK_INFLAMMATORY_RESPONSE	0.979433	0.613553	LGG
HALLMARK_PROTEIN_SECRETION	0.983991	0.613553	LGG
HALLMARK_GLYCOLYSIS	0.950467	0.763514	LGG
HALLMARK_APOPTOSIS	0.936713	0.766242	LGG
HALLMARK_COMPLEMENT	-0.857597	0.948867	LGG
HALLMARK_UNFOLDED_PROTEIN_RESPONSE	0.844268	0.963207	LGG
HALLMARK_UV_RESPONSE_DN	-0.80206	0.994202	LGG
HALLMARK_ANDROGEN_RESPONSE	-0.761127	0.994202	LGG
HALLMARK_COAGULATION	-0.779817	0.994202	LGG
HALLMARK_PI3K_AKT_MTOR_SIGNALING	0.760918	0.994202	LGG
HALLMARK_IL2_STAT5_SIGNALING	-0.76386	0.994202	LGG
HALLMARK_MTORC1_SIGNALING	-0.722881	1	LGG
HALLMARK_DNA_REPAIR	0.700308	1	LGG
HALLMARK_G2M_CHECKPOINT	2.09565	1.66667e-09	LIHC
HALLMARK_MITOTIC_SPINDLE	2.16725	1.66667e-09	LIHC
HALLMARK_OXIDATIVE_PHOSPHORYLATION	-3.0101	1.66667e-09	LIHC
HALLMARK_XENOBIOTIC_METABOLISM	-1.89437	5.43766e-08	LIHC
HALLMARK_E2F_TARGETS	1.8868	7.25823e-08	LIHC
HALLMARK_ADIPOGENESIS	-1.84954	3.15586e-07	LIHC
HALLMARK_MYC_TARGETS_V1	-1.84116	3.15586e-07	LIHC
HALLMARK_MYOGENESIS	-1.70254	6.48773e-06	LIHC
HALLMARK_REACTIVE_OXYGEN_SPECIES_PATHWAY	-2.21569	1.93651e-05	LIHC
HALLMARK_UV_RESPONSE_DN	1.75721	1.93651e-05	LIHC
HALLMARK_FATTY_ACID_METABOLISM	-1.69187	5.2174e-05	LIHC
HALLMARK_DNA_REPAIR	-1.71807	0.000102195	LIHC
HALLMARK_COAGULATION	-1.64173	0.000305043	LIHC
HALLMARK_MYC_TARGETS_V2	-1.87837	0.000460536	LIHC
HALLMARK_P53_PATHWAY	-1.35137	0.0059558	LIHC
HALLMARK_SPERMATOGENESIS	1.50844	0.0059558	LIHC
HALLMARK_INFLAMMATORY_RESPONSE	1.44381	0.00740887	LIHC
HALLMARK_TGF_BETA_SIGNALING	1.4959	0.0509431	LIHC
HALLMARK_GLYCOLYSIS	-1.13313	0.159363	LIHC
HALLMARK_HEDGEHOG_SIGNALING	1.33302	0.256151	LIHC
HALLMARK_UV_RESPONSE_UP	-1.20555	0.256151	LIHC
HALLMARK_PROTEIN_SECRETION	1.23912	0.290847	LIHC
HALLMARK_KRAS_SIGNALING_UP	1.17705	0.326427	LIHC
HALLMARK_IL6_JAK_STAT3_SIGNALING	1.19631	0.361411	LIHC
HALLMARK_PEROXISOME	-1.13405	0.361411	LIHC
HALLMARK_EPITHELIAL_MESENCHYMAL_TRANSITION	1.11828	0.446715	LIHC
HALLMARK_ANDROGEN_RESPONSE	1.13153	0.482819	LIHC
HALLMARK_HYPOXIA	-1.00744	0.566964	LIHC
HALLMARK_APICAL_JUNCTION	1.05604	0.625	LIHC
HALLMARK_NOTCH_SIGNALING	1.03927	0.667163	LIHC
HALLMARK_PI3K_AKT_MTOR_SIGNALING	1.03392	0.667163	LIHC
HALLMARK_TNFA_SIGNALING_VIA_NFKB	1.01292	0.702557	LIHC
HALLMARK_APOPTOSIS	-1.02864	0.867539	LIHC
HALLMARK_ESTROGEN_RESPONSE_EARLY	0.946706	0.867539	LIHC
HALLMARK_WNT_BETA_CATENIN_SIGNALING	0.917501	0.867539	LIHC
HALLMARK_APICAL_SURFACE	0.88412	0.885368	LIHC
HALLMARK_UNFOLDED_PROTEIN_RESPONSE	-0.925087	0.885368	LIHC
HALLMARK_INTERFERON_GAMMA_RESPONSE	0.911619	0.900602	LIHC
HALLMARK_HEME_METABOLISM	0.900729	0.900602	LIHC
HALLMARK_PANCREAS_BETA_CELLS	0.846736	0.900602	LIHC
HALLMARK_KRAS_SIGNALING_DN	0.881111	0.900602	LIHC
HALLMARK_ANGIOGENESIS	-0.830962	0.930233	LIHC
HALLMARK_ALLOGRAFT_REJECTION	0.854777	0.930233	LIHC
HALLMARK_INTERFERON_ALPHA_RESPONSE	0.786907	0.951087	LIHC
HALLMARK_BILE_ACID_METABOLISM	0.788857	0.951087	LIHC
HALLMARK_IL2_STAT5_SIGNALING	0.81211	0.951087	LIHC
HALLMARK_COMPLEMENT	0.784573	0.962988	LIHC
HALLMARK_CHOLESTEROL_HOMEOSTASIS	-0.753159	1	LIHC
HALLMARK_MTORC1_SIGNALING	0.684305	1	LIHC
HALLMARK_ESTROGEN_RESPONSE_LATE	-0.840891	1	LIHC
HALLMARK_ALLOGRAFT_REJECTION	-2.35374	6.25e-10	LUAD
HALLMARK_COAGULATION	-2.43522	6.25e-10	LUAD
HALLMARK_COMPLEMENT	-2.15351	6.25e-10	LUAD
HALLMARK_E2F_TARGETS	2.3434	6.25e-10	LUAD
HALLMARK_G2M_CHECKPOINT	2.35169	6.25e-10	LUAD
HALLMARK_OXIDATIVE_PHOSPHORYLATION	-2.22175	6.25e-10	LUAD
HALLMARK_TNFA_SIGNALING_VIA_NFKB	-2.35879	6.25e-10	LUAD
HALLMARK_XENOBIOTIC_METABOLISM	-2.34617	6.25e-10	LUAD
HALLMARK_P53_PATHWAY	-2.17608	6.50256e-10	LUAD
HALLMARK_INTERFERON_GAMMA_RESPONSE	-2.09484	3.83932e-09	LUAD
HALLMARK_MITOTIC_SPINDLE	2.02055	1.90655e-08	LUAD
HALLMARK_ESTROGEN_RESPONSE_LATE	-2.01054	4.48938e-08	LUAD
HALLMARK_ADIPOGENESIS	-2.00295	7.07708e-08	LUAD
HALLMARK_IL2_STAT5_SIGNALING	-1.94748	4.02003e-07	LUAD
HALLMARK_REACTIVE_OXYGEN_SPECIES_PATHWAY	-2.31106	4.30599e-07	LUAD
HALLMARK_KRAS_SIGNALING_UP	-1.92914	6.43775e-07	LUAD
HALLMARK_INFLAMMATORY_RESPONSE	-1.82568	3.39842e-06	LUAD
HALLMARK_SPERMATOGENESIS	1.86457	2.19251e-05	LUAD
HALLMARK_APOPTOSIS	-1.7997	7.25758e-05	LUAD
HALLMARK_FATTY_ACID_METABOLISM	-1.77366	8.07303e-05	LUAD
HALLMARK_IL6_JAK_STAT3_SIGNALING	-1.89923	8.59542e-05	LUAD
HALLMARK_INTERFERON_ALPHA_RESPONSE	-1.84595	0.000128084	LUAD
HALLMARK_UV_RESPONSE_UP	-1.62004	0.00103194	LUAD
HALLMARK_MYOGENESIS	-1.55954	0.00112604	LUAD
HALLMARK_ESTROGEN_RESPONSE_EARLY	-1.50263	0.00324798	LUAD
HALLMARK_HYPOXIA	-1.40744	0.0175328	LUAD
HALLMARK_KRAS_SIGNALING_DN	1.32905	0.0373217	LUAD
HALLMARK_HEME_METABOLISM	-1.3009	0.0719137	LUAD
HALLMARK_ANGIOGENESIS	-1.48125	0.0918672	LUAD
HALLMARK_APICAL_JUNCTION	-1.18517	0.125237	LUAD
HALLMARK_BILE_ACID_METABOLISM	-1.24656	0.125237	LUAD
HALLMARK_PANCREAS_BETA_CELLS	-1.30373	0.159439	LUAD
HALLMARK_PEROXISOME	-1.21009	0.180706	LUAD
HALLMARK_DNA_REPAIR	-1.13937	0.251412	LUAD
HALLMARK_MYC_TARGETS_V1	-1.10637	0.303128	LUAD
HALLMARK_EPITHELIAL_MESENCHYMAL_TRANSITION	-1.09871	0.303128	LUAD
HALLMARK_UV_RESPONSE_DN	1.12719	0.303128	LUAD
HALLMARK_CHOLESTEROL_HOMEOSTASIS	-0.967159	0.72738	LUAD
HALLMARK_TGF_BETA_SIGNALING	-0.929343	0.793232	LUAD
HALLMARK_ANDROGEN_RESPONSE	0.912511	0.793232	LUAD
HALLMARK_HEDGEHOG_SIGNALING	0.886563	0.793232	LUAD
HALLMARK_PI3K_AKT_MTOR_SIGNALING	0.86126	0.902062	LUAD
HALLMARK_GLYCOLYSIS	-0.892336	0.903316	LUAD
HALLMARK_NOTCH_SIGNALING	0.786654	0.903316	LUAD
HALLMARK_APICAL_SURFACE	-0.777571	0.9559	LUAD
HALLMARK_UNFOLDED_PROTEIN_RESPONSE	-0.75987	0.996422	LUAD
HALLMARK_MYC_TARGETS_V2	-0.680506	0.996422	LUAD
HALLMARK_MTORC1_SIGNALING	0.758184	0.996422	LUAD
HALLMARK_WNT_BETA_CATENIN_SIGNALING	0.578001	0.996422	LUAD
HALLMARK_PROTEIN_SECRETION	0.610834	0.996422	LUAD
HALLMARK_ALLOGRAFT_REJECTION	-2.69774	5e-10	LUSC
HALLMARK_COAGULATION	-2.28366	5e-10	LUSC
HALLMARK_COMPLEMENT	-2.31724	5e-10	LUSC
HALLMARK_E2F_TARGETS	2.78747	5e-10	LUSC
HALLMARK_G2M_CHECKPOINT	2.64732	5e-10	LUSC
HALLMARK_INFLAMMATORY_RESPONSE	-2.31912	5e-10	LUSC
HALLMARK_INTERFERON_ALPHA_RESPONSE	-2.46249	5e-10	LUSC
HALLMARK_INTERFERON_GAMMA_RESPONSE	-2.76931	5e-10	LUSC
HALLMARK_KRAS_SIGNALING_UP	-2.13938	5e-10	LUSC
HALLMARK_TNFA_SIGNALING_VIA_NFKB	-2.4869	5e-10	LUSC
HALLMARK_IL6_JAK_STAT3_SIGNALING	-2.27796	1.55355e-08	LUSC
HALLMARK_MITOTIC_SPINDLE	1.99239	5.72319e-08	LUSC
HALLMARK_MTORC1_SIGNALING	1.95868	8.31954e-08	LUSC
HALLMARK_IL2_STAT5_SIGNALING	-1.89202	3.14094e-07	LUSC
HALLMARK_SPERMATOGENESIS	1.91635	8.39034e-06	LUSC
HALLMARK_EPITHELIAL_MESENCHYMAL_TRANSITION	-1.75113	1.30042e-05	LUSC
HALLMARK_WNT_BETA_CATENIN_SIGNALING	1.97785	0.000213901	LUSC
HALLMARK_MYOGENESIS	-1.64096	0.00031438	LUSC
HALLMARK_MYC_TARGETS_V1	1.58464	0.00115875	LUSC
HALLMARK_P53_PATHWAY	-1.5696	0.00124212	LUSC
HALLMARK_KRAS_SIGNALING_DN	1.5354	0.0023388	LUSC
HALLMARK_APOPTOSIS	-1.5589	0.00293683	LUSC
HALLMARK_UV_RESPONSE_UP	-1.43508	0.0116313	LUSC
HALLMARK_GLYCOLYSIS	1.42649	0.0161727	LUSC
HALLMARK_ESTROGEN_RESPONSE_LATE	-1.40709	0.0190277	LUSC
HALLMARK_XENOBIOTIC_METABOLISM	-1.33698	0.0246957	LUSC
HALLMARK_ESTROGEN_RESPONSE_EARLY	-1.3062	0.0413552	LUSC
HALLMARK_MYC_TARGETS_V2	1.455	0.047407	LUSC
HALLMARK_HEDGEHOG_SIGNALING	1.5435	0.0804809	LUSC
HALLMARK_ANGIOGENESIS	-1.4409	0.0856008	LUSC
HALLMARK_TGF_BETA_SIGNALING	-1.34333	0.088513	LUSC
HALLMARK_APICAL_JUNCTION	-1.22932	0.0907628	LUSC
HALLMARK_ADIPOGENESIS	-1.22414	0.0970588	LUSC
HALLMARK_APICAL_SURFACE	-1.3585	0.0970588	LUSC
HALLMARK_ANDROGEN_RESPONSE	1.12488	0.334956	LUSC
HALLMARK_PI3K_AKT_MTOR_SIGNALING	1.09889	0.365919	LUSC
HALLMARK_UNFOLDED_PROTEIN_RESPONSE	1.08459	0.402632	LUSC
HALLMARK_CHOLESTEROL_HOMEOSTASIS	1.07824	0.402632	LUSC
HALLMARK_HYPOXIA	-1.02472	0.46424	LUSC
HALLMARK_DNA_REPAIR	1.0372	0.46424	LUSC
HALLMARK_PROTEIN_SECRETION	1.02905	0.46424	LUSC
HALLMARK_REACTIVE_OXYGEN_SPECIES_PATHWAY	1.04214	0.46424	LUSC
HALLMARK_OXIDATIVE_PHOSPHORYLATION	-0.994344	0.526776	LUSC
HALLMARK_FATTY_ACID_METABOLISM	0.986283	0.54474	LUSC
HALLMARK_BILE_ACID_METABOLISM	-0.960413	0.597082	LUSC
HALLMARK_NOTCH_SIGNALING	0.788009	0.840769	LUSC
HALLMARK_PEROXISOME	-0.860415	0.840769	LUSC
HALLMARK_PANCREAS_BETA_CELLS	0.794595	0.852638	LUSC
HALLMARK_HEME_METABOLISM	0.819361	0.935039	LUSC
HALLMARK_UV_RESPONSE_DN	0.781185	0.935039	LUSC
HALLMARK_EPITHELIAL_MESENCHYMAL_TRANSITION	2.37306	1.66667e-09	MESO
HALLMARK_INTERFERON_ALPHA_RESPONSE	-2.45338	1.66667e-09	MESO
HALLMARK_OXIDATIVE_PHOSPHORYLATION	-2.47857	1.66667e-09	MESO
HALLMARK_G2M_CHECKPOINT	1.98585	8.57677e-09	MESO
HALLMARK_MITOTIC_SPINDLE	1.90648	1.75304e-08	MESO
HALLMARK_E2F_TARGETS	1.79961	5.26527e-06	MESO
HALLMARK_P53_PATHWAY	-1.71536	2.05124e-05	MESO
HALLMARK_UV_RESPONSE_DN	1.78527	5.46355e-05	MESO
HALLMARK_ESTROGEN_RESPONSE_LATE	-1.64463	5.5339e-05	MESO
HALLMARK_INTERFERON_GAMMA_RESPONSE	-1.59246	0.00013664	MESO
HALLMARK_ESTROGEN_RESPONSE_EARLY	-1.56868	0.000144239	MESO
HALLMARK_HEDGEHOG_SIGNALING	1.86346	0.000738786	MESO
HALLMARK_DNA_REPAIR	-1.61313	0.00170546	MESO
HALLMARK_KRAS_SIGNALING_DN	-1.50023	0.0018184	MESO
HALLMARK_IL2_STAT5_SIGNALING	1.51285	0.00391191	MESO
HALLMARK_KRAS_SIGNALING_UP	1.50914	0.00391191	MESO
HALLMARK_APICAL_JUNCTION	1.45295	0.0122421	MESO
HALLMARK_FATTY_ACID_METABOLISM	-1.3526	0.0159454	MESO
HALLMARK_XENOBIOTIC_METABOLISM	-1.30372	0.0190228	MESO
HALLMARK_ADIPOGENESIS	-1.27693	0.0333689	MESO
HALLMARK_ANGIOGENESIS	1.53894	0.0467674	MESO
HALLMARK_REACTIVE_OXYGEN_SPECIES_PATHWAY	-1.42511	0.0709546	MESO
HALLMARK_SPERMATOGENESIS	1.34424	0.0841834	MESO
HALLMARK_TGF_BETA_SIGNALING	1.43401	0.0902231	MESO
HALLMARK_TNFA_SIGNALING_VIA_NFKB	-1.17722	0.0910834	MESO
HALLMARK_ALLOGRAFT_REJECTION	1.29523	0.0910834	MESO
HALLMARK_NOTCH_SIGNALING	1.45594	0.0910834	MESO
HALLMARK_WNT_BETA_CATENIN_SIGNALING	1.40447	0.0910834	MESO
HALLMARK_PANCREAS_BETA_CELLS	1.3649	0.110148	MESO
HALLMARK_MYOGENESIS	1.26717	0.110148	MESO
HALLMARK_MYC_TARGETS_V1	-1.14139	0.185502	MESO
HALLMARK_UV_RESPONSE_UP	-1.14137	0.234918	MESO
HALLMARK_HYPOXIA	1.15496	0.275781	MESO
HALLMARK_INFLAMMATORY_RESPONSE	1.12536	0.337408	MESO
HALLMARK_ANDROGEN_RESPONSE	1.13446	0.365728	MESO
HALLMARK_COAGULATION	-1.04693	0.447658	MESO
HALLMARK_GLYCOLYSIS	1.04642	0.514452	MESO
HALLMARK_PEROXISOME	-1.00383	0.551769	MESO
HALLMARK_HEME_METABOLISM	-1.00547	0.551769	MESO
HALLMARK_MTORC1_SIGNALING	1.0012	0.578416	MESO
HALLMARK_IL6_JAK_STAT3_SIGNALING	0.994819	0.578416	MESO
HALLMARK_COMPLEMENT	0.995792	0.578416	MESO
HALLMARK_PI3K_AKT_MTOR_SIGNALING	0.981886	0.583134	MESO
HALLMARK_MYC_TARGETS_V2	-0.979884	0.583134	MESO
HALLMARK_CHOLESTEROL_HOMEOSTASIS	0.923375	0.656286	MESO
HALLMARK_APOPTOSIS	0.932867	0.656286	MESO
HALLMARK_APICAL_SURFACE	0.90877	0.656286	MESO
HALLMARK_PROTEIN_SECRETION	0.882813	0.714106	MESO
HALLMARK_BILE_ACID_METABOLISM	0.825456	0.811063	MESO
HALLMARK_UNFOLDED_PROTEIN_RESPONSE	0.588676	0.996437	MESO
HALLMARK_E2F_TARGETS	2.19086	8.33333e-10	OV
HALLMARK_EPITHELIAL_MESENCHYMAL_TRANSITION	-2.78415	8.33333e-10	OV
HALLMARK_G2M_CHECKPOINT	2.22047	8.33333e-10	OV
HALLMARK_INTERFERON_ALPHA_RESPONSE	2.86155	8.33333e-10	OV
HALLMARK_INTERFERON_GAMMA_RESPONSE	2.44774	8.33333e-10	OV
HALLMARK_MYOGENESIS	-2.14074	8.33333e-10	OV
HALLMARK_APICAL_JUNCTION	-1.85543	2.31292e-06	OV
HALLMARK_MTORC1_SIGNALING	1.59713	0.000618032	OV
HALLMARK_INFLAMMATORY_RESPONSE	1.49175	0.00300828	OV
HALLMARK_PROTEIN_SECRETION	1.61157	0.0030125	OV
HALLMARK_UV_RESPONSE_DN	-1.61255	0.00307096	OV
HALLMARK_MITOTIC_SPINDLE	1.46968	0.00323715	OV
HALLMARK_ANGIOGENESIS	-1.74325	0.00845815	OV
HALLMARK_KRAS_SIGNALING_DN	-1.34932	0.0524146	OV
HALLMARK_SPERMATOGENESIS	1.34462	0.0524146	OV
HALLMARK_ANDROGEN_RESPONSE	1.35742	0.0524146	OV
HALLMARK_TGF_BETA_SIGNALING	-1.45929	0.0538181	OV
HALLMARK_ESTROGEN_RESPONSE_EARLY	1.26271	0.0597236	OV
HALLMARK_PEROXISOME	1.34586	0.0633002	OV
HALLMARK_PANCREAS_BETA_CELLS	-1.48976	0.0695831	OV
HALLMARK_BILE_ACID_METABOLISM	1.32364	0.0725839	OV
HALLMARK_KRAS_SIGNALING_UP	-1.31557	0.0766436	OV
HALLMARK_ESTROGEN_RESPONSE_LATE	1.21371	0.0766436	OV
HALLMARK_COAGULATION	-1.33898	0.0784519	OV
HALLMARK_WNT_BETA_CATENIN_SIGNALING	-1.41999	0.112676	OV
HALLMARK_ALLOGRAFT_REJECTION	-1.22725	0.163399	OV
HALLMARK_IL6_JAK_STAT3_SIGNALING	1.27257	0.163399	OV
HALLMARK_HEME_METABOLISM	1.15586	0.195312	OV
HALLMARK_HYPOXIA	-1.19402	0.201072	OV
HALLMARK_HEDGEHOG_SIGNALING	-1.27836	0.228967	OV
HALLMARK_TNFA_SIGNALING_VIA_NFKB	1.13523	0.236035	OV
HALLMARK_ADIPOGENESIS	-1.09616	0.372323	OV
HALLMARK_UNFOLDED_PROTEIN_RESPONSE	1.08167	0.382614	OV
HALLMARK_XENOBIOTIC_METABOLISM	-1.06852	0.409359	OV
HALLMARK_IL2_STAT5_SIGNALING	-1.05981	0.43635	OV
HALLMARK_APICAL_SURFACE	-1.0608	0.518636	OV
HALLMARK_NOTCH_SIGNALING	-1.01314	0.60179	OV
HALLMARK_UV_RESPONSE_UP	-0.995086	0.63926	OV
HALLMARK_MYC_TARGETS_V2	0.964204	0.63926	OV
HALLMARK_COMPLEMENT	-0.947077	0.763612	OV
HALLMARK_CHOLESTEROL_HOMEOSTASIS	0.916834	0.803694	OV
HALLMARK_APOPTOSIS	-0.909242	0.803694	OV
HALLMARK_P53_PATHWAY	-0.916948	0.803694	OV
HALLMARK_REACTIVE_OXYGEN_SPECIES_PATHWAY	-0.81053	0.880458	OV
HALLMARK_GLYCOLYSIS	0.875928	0.880664	OV
HALLMARK_FATTY_ACID_METABOLISM	-0.841957	0.880664	OV
HALLMARK_DNA_REPAIR	-0.835248	0.880664	OV
HALLMARK_MYC_TARGETS_V1	0.854598	0.894608	OV
HALLMARK_OXIDATIVE_PHOSPHORYLATION	0.846623	0.909235	OV
HALLMARK_PI3K_AKT_MTOR_SIGNALING	0.756806	0.964401	OV
HALLMARK_ALLOGRAFT_REJECTION	2.25424	1.25e-09	PAAD
HALLMARK_INFLAMMATORY_RESPONSE	2.19804	1.25e-09	PAAD
HALLMARK_INTERFERON_GAMMA_RESPONSE	1.97084	1.25e-09	PAAD
HALLMARK_OXIDATIVE_PHOSPHORYLATION	-2.546	1.25e-09	PAAD
HALLMARK_IL6_JAK_STAT3_SIGNALING	2.0815	7.44642e-09	PAAD
HALLMARK_KRAS_SIGNALING_DN	1.77827	5.27346e-07	PAAD
HALLMARK_IL2_STAT5_SIGNALING	1.75678	7.17168e-07	PAAD
HALLMARK_KRAS_SIGNALING_UP	1.73182	1.83936e-06	PAAD
HALLMARK_EPITHELIAL_MESENCHYMAL_TRANSITION	1.69411	6.59803e-06	PAAD
HALLMARK_COMPLEMENT	1.71037	8.79893e-06	PAAD
HALLMARK_TNFA_SIGNALING_VIA_NFKB	1.6862	1.22756e-05	PAAD
HALLMARK_G2M_CHECKPOINT	1.6858	1.95051e-05	PAAD
HALLMARK_DNA_REPAIR	-1.71898	8.14379e-05	PAAD
HALLMARK_UV_RESPONSE_DN	1.68248	8.2936e-05	PAAD
HALLMARK_INTERFERON_ALPHA_RESPONSE	1.67571	0.00130539	PAAD
HALLMARK_MITOTIC_SPINDLE	1.50676	0.00181239	PAAD
HALLMARK_MYC_TARGETS_V1	-1.30429	0.00496029	PAAD
HALLMARK_APICAL_SURFACE	1.54956	0.0310689	PAAD
HALLMARK_ANDROGEN_RESPONSE	1.47601	0.0373049	PAAD
HALLMARK_E2F_TARGETS	1.32488	0.083502	PAAD
HALLMARK_SPERMATOGENESIS	1.26587	0.199027	PAAD
HALLMARK_ANGIOGENESIS	1.3433	0.209661	PAAD
HALLMARK_PANCREAS_BETA_CELLS	-1.27026	0.236553	PAAD
HALLMARK_ESTROGEN_RESPONSE_EARLY	1.19143	0.280733	PAAD
HALLMARK_XENOBIOTIC_METABOLISM	1.17091	0.307341	PAAD
HALLMARK_TGF_BETA_SIGNALING	1.23932	0.307341	PAAD
HALLMARK_APOPTOSIS	1.17506	0.31211	PAAD
HALLMARK_BILE_ACID_METABOLISM	1.18766	0.318744	PAAD
HALLMARK_COAGULATION	1.16262	0.338416	PAAD
HALLMARK_MYC_TARGETS_V2	-1.11842	0.350712	PAAD
HALLMARK_HEDGEHOG_SIGNALING	1.18149	0.350712	PAAD
HALLMARK_REACTIVE_OXYGEN_SPECIES_PATHWAY	-1.11619	0.350712	PAAD
HALLMARK_MYOGENESIS	-1.00927	0.350712	PAAD
HALLMARK_ESTROGEN_RESPONSE_LATE	1.09716	0.40337	PAAD
HALLMARK_PROTEIN_SECRETION	1.02519	0.603687	PAAD
HALLMARK_FATTY_ACID_METABOLISM	1.02546	0.60986	PAAD
HALLMARK_APICAL_JUNCTION	0.992515	0.662573	PAAD
HALLMARK_GLYCOLYSIS	-0.958722	0.662573	PAAD
HALLMARK_PI3K_AKT_MTOR_SIGNALING	0.981713	0.662573	PAAD
HALLMARK_WNT_BETA_CATENIN_SIGNALING	0.930077	0.742797	PAAD
HALLMARK_NOTCH_SIGNALING	0.875143	0.77867	PAAD
HALLMARK_HEME_METABOLISM	0.918848	0.800888	PAAD
HALLMARK_PEROXISOME	0.878729	0.811688	PAAD
HALLMARK_CHOLESTEROL_HOMEOSTASIS	-0.898567	0.811688	PAAD
HALLMARK_HYPOXIA	0.878338	0.843184	PAAD
HALLMARK_ADIPOGENESIS	0.861226	0.846879	PAAD
HALLMARK_MTORC1_SIGNALING	0.825168	0.905387	PAAD
HALLMARK_UV_RESPONSE_UP	-0.918457	0.980642	PAAD
HALLMARK_P53_PATHWAY	-0.712502	1	PAAD
HALLMARK_UNFOLDED_PROTEIN_RESPONSE	0.457452	1	PAAD
HALLMARK_MITOTIC_SPINDLE	2.05699	1.66667e-09	PCPG
HALLMARK_OXIDATIVE_PHOSPHORYLATION	-2.48823	1.66667e-09	PCPG
HALLMARK_TNFA_SIGNALING_VIA_NFKB	-2.67826	1.66667e-09	PCPG
HALLMARK_HYPOXIA	-1.97475	8.10667e-08	PCPG
HALLMARK_EPITHELIAL_MESENCHYMAL_TRANSITION	-1.92006	6.12174e-07	PCPG
HALLMARK_ALLOGRAFT_REJECTION	-1.85679	1.54941e-06	PCPG
HALLMARK_P53_PATHWAY	-1.86183	1.54941e-06	PCPG
HALLMARK_ADIPOGENESIS	-1.82745	1.59265e-06	PCPG
HALLMARK_MYC_TARGETS_V1	-1.83943	2.22223e-06	PCPG
HALLMARK_MYOGENESIS	-1.79924	3.28038e-06	PCPG
HALLMARK_XENOBIOTIC_METABOLISM	-1.79961	4.12288e-06	PCPG
HALLMARK_INFLAMMATORY_RESPONSE	-1.7952	4.12288e-06	PCPG
HALLMARK_UV_RESPONSE_UP	-1.86089	4.53466e-06	PCPG
HALLMARK_APOPTOSIS	-1.83953	6.12758e-06	PCPG
HALLMARK_ESTROGEN_RESPONSE_LATE	-1.73309	1.07871e-05	PCPG
HALLMARK_COMPLEMENT	-1.71528	1.42113e-05	PCPG
HALLMARK_IL2_STAT5_SIGNALING	-1.73618	1.5477e-05	PCPG
HALLMARK_GLYCOLYSIS	-1.58614	0.000161214	PCPG
HALLMARK_CHOLESTEROL_HOMEOSTASIS	-1.79082	0.000306801	PCPG
HALLMARK_KRAS_SIGNALING_UP	-1.54717	0.000307067	PCPG
HALLMARK_MTORC1_SIGNALING	-1.57618	0.000307067	PCPG
HALLMARK_REACTIVE_OXYGEN_SPECIES_PATHWAY	-1.92602	0.000307067	PCPG
HALLMARK_COAGULATION	-1.59163	0.000708437	PCPG
HALLMARK_INTERFERON_GAMMA_RESPONSE	-1.50616	0.000708437	PCPG
HALLMARK_FATTY_ACID_METABOLISM	-1.57238	0.000774106	PCPG
HALLMARK_G2M_CHECKPOINT	1.55108	0.00133689	PCPG
HALLMARK_DNA_REPAIR	-1.59912	0.00151156	PCPG
HALLMARK_E2F_TARGETS	1.38432	0.0156526	PCPG
HALLMARK_MYC_TARGETS_V2	-1.50383	0.0245498	PCPG
HALLMARK_IL6_JAK_STAT3_SIGNALING	-1.40094	0.0262332	PCPG
HALLMARK_ANGIOGENESIS	-1.54689	0.0273382	PCPG
HALLMARK_UNFOLDED_PROTEIN_RESPONSE	-1.35108	0.029362	PCPG
HALLMARK_UV_RESPONSE_DN	1.32334	0.0781193	PCPG
HALLMARK_INTERFERON_ALPHA_RESPONSE	-1.19523	0.125095	PCPG
HALLMARK_TGF_BETA_SIGNALING	-1.18133	0.227743	PCPG
HALLMARK_SPERMATOGENESIS	1.16597	0.268709	PCPG
HALLMARK_ESTROGEN_RESPONSE_EARLY	-1.0397	0.387597	PCPG
HALLMARK_HEDGEHOG_SIGNALING	1.10916	0.397618	PCPG
HALLMARK_PEROXISOME	-1.03113	0.504699	PCPG
HALLMARK_NOTCH_SIGNALING	0.972829	0.612056	PCPG
HALLMARK_PROTEIN_SECRETION	0.938189	0.693725	PCPG
HALLMARK_ANDROGEN_RESPONSE	-0.917188	0.808016	PCPG
HALLMARK_KRAS_SIGNALING_DN	0.901037	0.815015	PCPG
HALLMARK_PANCREAS_BETA_CELLS	-0.852758	0.830966	PCPG
HALLMARK_APICAL_JUNCTION	0.870381	0.850575	PCPG
HALLMARK_BILE_ACID_METABOLISM	0.805945	0.889328	PCPG
HALLMARK_APICAL_SURFACE	-0.795032	0.90717	PCPG
HALLMARK_HEME_METABOLISM	0.799324	0.924212	PCPG
HALLMARK_WNT_BETA_CATENIN_SIGNALING	-0.737061	0.941652	PCPG
HALLMARK_PI3K_AKT_MTOR_SIGNALING	0.610912	0.993711	PCPG
HALLMARK_ALLOGRAFT_REJECTION	2.28626	1.25e-09	PRAD
HALLMARK_INFLAMMATORY_RESPONSE	2.26455	1.25e-09	PRAD
HALLMARK_INTERFERON_GAMMA_RESPONSE	2.12107	1.25e-09	PRAD
HALLMARK_OXIDATIVE_PHOSPHORYLATION	-2.80433	1.25e-09	PRAD
HALLMARK_MITOTIC_SPINDLE	2.00728	3.4213e-09	PRAD
HALLMARK_DNA_REPAIR	-2.10578	1.06268e-07	PRAD
HALLMARK_KRAS_SIGNALING_UP	1.9353	1.06268e-07	PRAD
HALLMARK_MYC_TARGETS_V1	-1.96662	1.65964e-07	PRAD
HALLMARK_IL6_JAK_STAT3_SIGNALING	2.10449	2.98207e-07	PRAD
HALLMARK_ADIPOGENESIS	-1.87144	1.4779e-06	PRAD
HALLMARK_TNFA_SIGNALING_VIA_NFKB	1.81312	2.39216e-06	PRAD
HALLMARK_IL2_STAT5_SIGNALING	1.78645	5.0534e-06	PRAD
HALLMARK_INTERFERON_ALPHA_RESPONSE	1.94049	1.24908e-05	PRAD
HALLMARK_UV_RESPONSE_DN	1.83448	1.69018e-05	PRAD
HALLMARK_COMPLEMENT	1.69594	5.77884e-05	PRAD
HALLMARK_FATTY_ACID_METABOLISM	-1.74032	9.58154e-05	PRAD
HALLMARK_G2M_CHECKPOINT	1.67548	0.000270028	PRAD
HALLMARK_EPITHELIAL_MESENCHYMAL_TRANSITION	1.59255	0.00074412	PRAD
HALLMARK_HEDGEHOG_SIGNALING	1.88965	0.00113483	PRAD
HALLMARK_TGF_BETA_SIGNALING	1.73321	0.00410465	PRAD
HALLMARK_REACTIVE_OXYGEN_SPECIES_PATHWAY	-1.68637	0.00794993	PRAD
HALLMARK_MYOGENESIS	-1.40471	0.00825175	PRAD
HALLMARK_MYC_TARGETS_V2	-1.66682	0.00825175	PRAD
HALLMARK_GLYCOLYSIS	-1.38646	0.0111936	PRAD
HALLMARK_XENOBIOTIC_METABOLISM	-1.3831	0.0111936	PRAD
HALLMARK_CHOLESTEROL_HOMEOSTASIS	-1.47197	0.0176376	PRAD
HALLMARK_KRAS_SIGNALING_DN	1.35794	0.05132	PRAD
HALLMARK_UV_RESPONSE_UP	-1.24627	0.0691849	PRAD
HALLMARK_E2F_TARGETS	1.27331	0.110132	PRAD
HALLMARK_ANGIOGENESIS	1.34747	0.156615	PRAD
HALLMARK_PEROXISOME	-1.21139	0.158449	PRAD
HALLMARK_APICAL_JUNCTION	1.19632	0.198957	PRAD
HALLMARK_UNFOLDED_PROTEIN_RESPONSE	-1.14345	0.2331	PRAD
HALLMARK_ESTROGEN_RESPONSE_EARLY	1.15923	0.261402	PRAD
HALLMARK_SPERMATOGENESIS	1.16807	0.266512	PRAD
HALLMARK_COAGULATION	1.13411	0.300473	PRAD
HALLMARK_P53_PATHWAY	-1.10432	0.328513	PRAD
HALLMARK_APICAL_SURFACE	1.16424	0.328513	PRAD
HALLMARK_PROTEIN_SECRETION	1.11489	0.342727	PRAD
HALLMARK_WNT_BETA_CATENIN_SIGNALING	1.10559	0.394474	PRAD
HALLMARK_HYPOXIA	1.05748	0.428297	PRAD
HALLMARK_BILE_ACID_METABOLISM	-1.04734	0.446973	PRAD
HALLMARK_NOTCH_SIGNALING	1.04574	0.446973	PRAD
HALLMARK_PI3K_AKT_MTOR_SIGNALING	0.995365	0.553754	PRAD
HALLMARK_APOPTOSIS	0.992396	0.571859	PRAD
HALLMARK_ESTROGEN_RESPONSE_LATE	-0.990795	0.594034	PRAD
HALLMARK_PANCREAS_BETA_CELLS	0.838045	0.776229	PRAD
HALLMARK_ANDROGEN_RESPONSE	-0.882345	0.821208	PRAD
HALLMARK_HEME_METABOLISM	0.852397	0.822151	PRAD
HALLMARK_MTORC1_SIGNALING	-0.85847	0.905882	PRAD
HALLMARK_E2F_TARGETS	2.88341	1.25e-09	READ
HALLMARK_G2M_CHECKPOINT	2.75086	1.25e-09	READ
HALLMARK_MITOTIC_SPINDLE	2.3178	1.25e-09	READ
HALLMARK_MYOGENESIS	-2.37545	1.25e-09	READ
HALLMARK_MTORC1_SIGNALING	2.03261	1.74485e-07	READ
HALLMARK_APICAL_JUNCTION	-2.04418	6.46962e-07	READ
HALLMARK_ALLOGRAFT_REJECTION	1.91817	6.02432e-06	READ
HALLMARK_XENOBIOTIC_METABOLISM	-1.88804	2.22358e-05	READ
HALLMARK_MYC_TARGETS_V1	1.76465	0.000158299	READ
HALLMARK_PROTEIN_SECRETION	1.91072	0.000316801	READ
HALLMARK_KRAS_SIGNALING_DN	-1.75696	0.000321599	READ
HALLMARK_COAGULATION	-1.81382	0.000321599	READ
HALLMARK_EPITHELIAL_MESENCHYMAL_TRANSITION	-1.67954	0.000692474	READ
HALLMARK_P53_PATHWAY	-1.65191	0.00163861	READ
HALLMARK_ESTROGEN_RESPONSE_LATE	-1.57291	0.0019841	READ
HALLMARK_IL6_JAK_STAT3_SIGNALING	1.76917	0.00257807	READ
HALLMARK_INTERFERON_GAMMA_RESPONSE	1.53413	0.00351104	READ
HALLMARK_INFLAMMATORY_RESPONSE	1.52278	0.00533809	READ
HALLMARK_PANCREAS_BETA_CELLS	-1.77295	0.00707388	READ
HALLMARK_ESTROGEN_RESPONSE_EARLY	-1.3808	0.0423457	READ
HALLMARK_REACTIVE_OXYGEN_SPECIES_PATHWAY	-1.47998	0.0501179	READ
HALLMARK_WNT_BETA_CATENIN_SIGNALING	-1.47916	0.0547288	READ
HALLMARK_UV_RESPONSE_UP	-1.36153	0.064952	READ
HALLMARK_ANDROGEN_RESPONSE	1.30982	0.100283	READ
HALLMARK_MYC_TARGETS_V2	1.39161	0.100283	READ
HALLMARK_SPERMATOGENESIS	1.31806	0.100283	READ
HALLMARK_FATTY_ACID_METABOLISM	-1.25427	0.124016	READ
HALLMARK_PI3K_AKT_MTOR_SIGNALING	1.25966	0.141112	READ
HALLMARK_TNFA_SIGNALING_VIA_NFKB	1.232	0.141112	READ
HALLMARK_IL2_STAT5_SIGNALING	1.21885	0.149951	READ
HALLMARK_NOTCH_SIGNALING	-1.25576	0.228833	READ
HALLMARK_ADIPOGENESIS	-1.14785	0.230769	READ
HALLMARK_HYPOXIA	-1.11201	0.293706	READ
HALLMARK_INTERFERON_ALPHA_RESPONSE	1.10887	0.397518	READ
HALLMARK_BILE_ACID_METABOLISM	-1.06143	0.435693	READ
HALLMARK_APICAL_SURFACE	-1.06323	0.473073	READ
HALLMARK_KRAS_SIGNALING_UP	1.04833	0.473073	READ
HALLMARK_COMPLEMENT	1.02274	0.541453	READ
HALLMARK_UNFOLDED_PROTEIN_RESPONSE	0.966598	0.692424	READ
HALLMARK_ANGIOGENESIS	0.897744	0.758772	READ
HALLMARK_TGF_BETA_SIGNALING	-0.901837	0.804359	READ
HALLMARK_GLYCOLYSIS	-0.91603	0.86245	READ
HALLMARK_HEDGEHOG_SIGNALING	-0.783881	0.931739	READ
HALLMARK_HEME_METABOLISM	-0.869335	0.931739	READ
HALLMARK_DNA_REPAIR	0.835208	0.931739	READ
HALLMARK_APOPTOSIS	-0.857171	0.934608	READ
HALLMARK_UV_RESPONSE_DN	0.806189	0.934608	READ
HALLMARK_PEROXISOME	-0.801048	0.934608	READ
HALLMARK_OXIDATIVE_PHOSPHORYLATION	-0.827888	0.934608	READ
HALLMARK_CHOLESTEROL_HOMEOSTASIS	-0.697226	0.96875	READ
HALLMARK_ALLOGRAFT_REJECTION	-3.02846	6.25e-10	SARC
HALLMARK_COMPLEMENT	-2.60705	6.25e-10	SARC
HALLMARK_E2F_TARGETS	2.22841	6.25e-10	SARC
HALLMARK_IL6_JAK_STAT3_SIGNALING	-2.45981	6.25e-10	SARC
HALLMARK_INFLAMMATORY_RESPONSE	-2.8578	6.25e-10	SARC
HALLMARK_INTERFERON_GAMMA_RESPONSE	-2.66962	6.25e-10	SARC
HALLMARK_KRAS_SIGNALING_UP	-2.3037	6.25e-10	SARC
HALLMARK_TNFA_SIGNALING_VIA_NFKB	-2.4014	6.25e-10	SARC
HALLMARK_EPITHELIAL_MESENCHYMAL_TRANSITION	-2.13559	6.76004e-10	SARC
HALLMARK_COAGULATION	-2.23456	7.28327e-10	SARC
HALLMARK_IL2_STAT5_SIGNALING	-2.12482	7.28327e-10	SARC
HALLMARK_XENOBIOTIC_METABOLISM	-2.09809	8.44955e-10	SARC
HALLMARK_INTERFERON_ALPHA_RESPONSE	-2.31012	1.40895e-09	SARC
HALLMARK_G2M_CHECKPOINT	2.04009	7.56078e-09	SARC
HALLMARK_MITOTIC_SPINDLE	1.95065	2.08371e-08	SARC
HALLMARK_APOPTOSIS	-2.0171	3.55772e-07	SARC
HALLMARK_P53_PATHWAY	-1.89504	3.71391e-07	SARC
HALLMARK_ANGIOGENESIS	-2.12475	1.3802e-05	SARC
HALLMARK_MYOGENESIS	1.70392	7.22258e-05	SARC
HALLMARK_ADIPOGENESIS	-1.62378	0.000277727	SARC
HALLMARK_KRAS_SIGNALING_DN	1.56627	0.00123376	SARC
HALLMARK_HYPOXIA	-1.46819	0.00620231	SARC
HALLMARK_REACTIVE_OXYGEN_SPECIES_PATHWAY	-1.65692	0.0131466	SARC
HALLMARK_OXIDATIVE_PHOSPHORYLATION	-1.39381	0.0132733	SARC
HALLMARK_SPERMATOGENESIS	1.38057	0.0223436	SARC
HALLMARK_APICAL_SURFACE	-1.4372	0.06397	SARC
HALLMARK_FATTY_ACID_METABOLISM	-1.22818	0.125	SARC
HALLMARK_BILE_ACID_METABOLISM	-1.23692	0.125	SARC
HALLMARK_NOTCH_SIGNALING	-1.37076	0.125	SARC
HALLMARK_ESTROGEN_RESPONSE_LATE	-1.19353	0.125	SARC
HALLMARK_DNA_REPAIR	-1.18796	0.162841	SARC
HALLMARK_PANCREAS_BETA_CELLS	1.28114	0.176813	SARC
HALLMARK_HEDGEHOG_SIGNALING	1.31416	0.176813	SARC
HALLMARK_APICAL_JUNCTION	1.09509	0.339286	SARC
HALLMARK_GLYCOLYSIS	-1.08035	0.339286	SARC
HALLMARK_UNFOLDED_PROTEIN_RESPONSE	-1.09888	0.365497	SARC
HALLMARK_UV_RESPONSE_UP	-1.06259	0.419154	SARC
HALLMARK_UV_RESPONSE_DN	1.00353	0.585762	SARC
HALLMARK_ESTROGEN_RESPONSE_EARLY	0.996878	0.585762	SARC
HALLMARK_CHOLESTEROL_HOMEOSTASIS	-0.999044	0.585762	SARC
HALLMARK_MTORC1_SIGNALING	-0.982888	0.605194	SARC
HALLMARK_MYC_TARGETS_V2	-0.973451	0.634921	SARC
HALLMARK_PEROXISOME	-0.929497	0.734819	SARC
HALLMARK_WNT_BETA_CATENIN_SIGNALING	-0.870244	0.810589	SARC
HALLMARK_TGF_BETA_SIGNALING	0.814465	0.909091	SARC
HALLMARK_PI3K_AKT_MTOR_SIGNALING	-0.778682	0.985726	SARC
HALLMARK_HEME_METABOLISM	-0.843343	0.985726	SARC
HALLMARK_ANDROGEN_RESPONSE	-0.705836	0.997494	SARC
HALLMARK_PROTEIN_SECRETION	0.614682	0.997494	SARC
HALLMARK_MYC_TARGETS_V1	-0.705025	0.997494	SARC
HALLMARK_ALLOGRAFT_REJECTION	1.96178	1.66667e-09	SKCM
HALLMARK_INFLAMMATORY_RESPONSE	1.97909	1.66667e-09	SKCM
HALLMARK_OXIDATIVE_PHOSPHORYLATION	-2.09391	1.66667e-09	SKCM
HALLMARK_KRAS_SIGNALING_UP	1.90898	2.60278e-09	SKCM
HALLMARK_INTERFERON_GAMMA_RESPONSE	1.78809	5.01369e-07	SKCM
HALLMARK_DNA_REPAIR	-1.60308	0.000548496	SKCM
HALLMARK_MITOTIC_SPINDLE	1.5712	0.000550686	SKCM
HALLMARK_MYC_TARGETS_V2	-1.95778	0.000662899	SKCM
HALLMARK_UV_RESPONSE_DN	1.61217	0.000843672	SKCM
HALLMARK_ESTROGEN_RESPONSE_LATE	-1.45237	0.000932932	SKCM
HALLMARK_COMPLEMENT	1.5427	0.0011578	SKCM
HALLMARK_IL6_JAK_STAT3_SIGNALING	1.67959	0.00122453	SKCM
HALLMARK_G2M_CHECKPOINT	1.51728	0.00142275	SKCM
HALLMARK_IL2_STAT5_SIGNALING	1.52779	0.00144382	SKCM
HALLMARK_KRAS_SIGNALING_DN	-1.42527	0.00212388	SKCM
HALLMARK_EPITHELIAL_MESENCHYMAL_TRANSITION	1.50381	0.00230434	SKCM
HALLMARK_ESTROGEN_RESPONSE_EARLY	-1.38781	0.0026573	SKCM
HALLMARK_P53_PATHWAY	-1.3565	0.00503163	SKCM
HALLMARK_ADIPOGENESIS	-1.33612	0.00552527	SKCM
HALLMARK_TNFA_SIGNALING_VIA_NFKB	1.40641	0.00987956	SKCM
HALLMARK_INTERFERON_ALPHA_RESPONSE	1.51902	0.00987956	SKCM
HALLMARK_MYOGENESIS	-1.28153	0.0117489	SKCM
HALLMARK_ANDROGEN_RESPONSE	1.46779	0.0211168	SKCM
HALLMARK_UV_RESPONSE_UP	-1.26202	0.0212739	SKCM
HALLMARK_CHOLESTEROL_HOMEOSTASIS	-1.31163	0.0504991	SKCM
HALLMARK_REACTIVE_OXYGEN_SPECIES_PATHWAY	-1.33533	0.0504991	SKCM
HALLMARK_E2F_TARGETS	1.33298	0.0536769	SKCM
HALLMARK_XENOBIOTIC_METABOLISM	-1.14393	0.0548747	SKCM
HALLMARK_APICAL_SURFACE	-1.41076	0.066637	SKCM
HALLMARK_PROTEIN_SECRETION	1.34909	0.0851852	SKCM
HALLMARK_PANCREAS_BETA_CELLS	-1.29886	0.109073	SKCM
HALLMARK_SPERMATOGENESIS	1.28917	0.115496	SKCM
HALLMARK_ANGIOGENESIS	1.32298	0.143402	SKCM
HALLMARK_FATTY_ACID_METABOLISM	-1.05263	0.281127	SKCM
HALLMARK_GLYCOLYSIS	-1.04581	0.291291	SKCM
HALLMARK_PI3K_AKT_MTOR_SIGNALING	1.1678	0.291291	SKCM
HALLMARK_TGF_BETA_SIGNALING	1.17596	0.291499	SKCM
HALLMARK_APOPTOSIS	1.10478	0.34878	SKCM
HALLMARK_UNFOLDED_PROTEIN_RESPONSE	-1.06083	0.413773	SKCM
HALLMARK_MYC_TARGETS_V1	-1.00677	0.442772	SKCM
HALLMARK_PEROXISOME	-0.993045	0.638792	SKCM
HALLMARK_APICAL_JUNCTION	0.943041	0.724532	SKCM
HALLMARK_HEDGEHOG_SIGNALING	0.888364	0.753419	SKCM
HALLMARK_BILE_ACID_METABOLISM	0.891911	0.776616	SKCM
HALLMARK_MTORC1_SIGNALING	0.87655	0.837326	SKCM
HALLMARK_WNT_BETA_CATENIN_SIGNALING	-0.829885	0.903828	SKCM
HALLMARK_HYPOXIA	0.79667	0.946272	SKCM
HALLMARK_COAGULATION	0.758382	0.946272	SKCM
HALLMARK_HEME_METABOLISM	0.752098	0.956688	SKCM
HALLMARK_NOTCH_SIGNALING	0.645785	0.956688	SKCM
HALLMARK_E2F_TARGETS	2.87636	9.84608e-10	STAD
HALLMARK_EPITHELIAL_MESENCHYMAL_TRANSITION	-2.73589	9.84608e-10	STAD
HALLMARK_G2M_CHECKPOINT	2.78385	9.84608e-10	STAD
HALLMARK_MITOTIC_SPINDLE	2.42759	9.84608e-10	STAD
HALLMARK_XENOBIOTIC_METABOLISM	-2.33109	9.84608e-10	STAD
HALLMARK_P53_PATHWAY	-2.18944	9.84608e-10	STAD
HALLMARK_COAGULATION	-2.37521	2.86714e-09	STAD
HALLMARK_ESTROGEN_RESPONSE_LATE	-2.10915	3.36932e-08	STAD
HALLMARK_SPERMATOGENESIS	2.16342	9.09412e-07	STAD
HALLMARK_OXIDATIVE_PHOSPHORYLATION	-1.95017	1.01745e-06	STAD
HALLMARK_MYOGENESIS	-1.90189	4.4699e-06	STAD
HALLMARK_FATTY_ACID_METABOLISM	-1.93576	5.516e-06	STAD
HALLMARK_HYPOXIA	-1.88026	5.516e-06	STAD
HALLMARK_TNFA_SIGNALING_VIA_NFKB	-1.87381	5.516e-06	STAD
HALLMARK_KRAS_SIGNALING_UP	-1.81988	3.37024e-05	STAD
HALLMARK_ESTROGEN_RESPONSE_EARLY	-1.75357	7.78168e-05	STAD
HALLMARK_ADIPOGENESIS	-1.71211	0.00021433	STAD
HALLMARK_GLYCOLYSIS	-1.6479	0.000306699	STAD
HALLMARK_BILE_ACID_METABOLISM	-1.74842	0.000620642	STAD
HALLMARK_ANGIOGENESIS	-1.98139	0.000815211	STAD
HALLMARK_APOPTOSIS	-1.57843	0.00221558	STAD
HALLMARK_REACTIVE_OXYGEN_SPECIES_PATHWAY	-1.79259	0.00368681	STAD
HALLMARK_UV_RESPONSE_UP	-1.57653	0.00374653	STAD
HALLMARK_ALLOGRAFT_REJECTION	1.39131	0.0159783	STAD
HALLMARK_PANCREAS_BETA_CELLS	-1.7659	0.0167791	STAD
HALLMARK_MYC_TARGETS_V2	1.5557	0.0167791	STAD
HALLMARK_APICAL_JUNCTION	-1.4346	0.0167791	STAD
HALLMARK_COMPLEMENT	-1.32949	0.0194217	STAD
HALLMARK_PEROXISOME	-1.44103	0.0306407	STAD
HALLMARK_MYC_TARGETS_V1	1.30552	0.0463154	STAD
HALLMARK_INFLAMMATORY_RESPONSE	-1.26882	0.0625958	STAD
HALLMARK_CHOLESTEROL_HOMEOSTASIS	-1.36908	0.0807883	STAD
HALLMARK_KRAS_SIGNALING_DN	1.26903	0.0959824	STAD
HALLMARK_APICAL_SURFACE	-1.38754	0.0959824	STAD
HALLMARK_UV_RESPONSE_DN	-1.0651	0.467532	STAD
HALLMARK_TGF_BETA_SIGNALING	-1.04177	0.525526	STAD
HALLMARK_INTERFERON_GAMMA_RESPONSE	1.01983	0.558732	STAD
HALLMARK_PI3K_AKT_MTOR_SIGNALING	0.958712	0.700165	STAD
HALLMARK_HEDGEHOG_SIGNALING	-0.939489	0.71354	STAD
HALLMARK_IL6_JAK_STAT3_SIGNALING	0.926378	0.740418	STAD
HALLMARK_NOTCH_SIGNALING	-0.889081	0.740418	STAD
HALLMARK_DNA_REPAIR	-0.919397	0.771034	STAD
HALLMARK_WNT_BETA_CATENIN_SIGNALING	0.874243	0.78737	STAD
HALLMARK_MTORC1_SIGNALING	0.889038	0.879415	STAD
HALLMARK_ANDROGEN_RESPONSE	-0.805493	0.969089	STAD
HALLMARK_IL2_STAT5_SIGNALING	-0.809141	0.989083	STAD
HALLMARK_HEME_METABOLISM	-0.815188	0.989083	STAD
HALLMARK_UNFOLDED_PROTEIN_RESPONSE	-0.753258	0.989083	STAD
HALLMARK_INTERFERON_ALPHA_RESPONSE	0.694948	0.99183	STAD
HALLMARK_PROTEIN_SECRETION	0.602145	0.998339	STAD
HALLMARK_COAGULATION	-2.19488	7.14286e-10	TGCT
HALLMARK_E2F_TARGETS	2.93523	7.14286e-10	TGCT
HALLMARK_EPITHELIAL_MESENCHYMAL_TRANSITION	-2.42713	7.14286e-10	TGCT
HALLMARK_G2M_CHECKPOINT	2.40334	7.14286e-10	TGCT
HALLMARK_MTORC1_SIGNALING	2.32466	7.14286e-10	TGCT
HALLMARK_MYC_TARGETS_V1	2.91382	7.14286e-10	TGCT
HALLMARK_MYC_TARGETS_V2	2.7683	7.14286e-10	TGCT
HALLMARK_MYOGENESIS	-1.99784	2.29155e-08	TGCT
HALLMARK_UNFOLDED_PROTEIN_RESPONSE	2.21673	5.13883e-08	TGCT
HALLMARK_OXIDATIVE_PHOSPHORYLATION	1.97029	1.65271e-07	TGCT
HALLMARK_SPERMATOGENESIS	2.04188	4.45767e-07	TGCT
HALLMARK_BILE_ACID_METABOLISM	-1.91257	1.20877e-05	TGCT
HALLMARK_APICAL_JUNCTION	-1.72272	4.49143e-05	TGCT
HALLMARK_KRAS_SIGNALING_UP	-1.72556	4.49554e-05	TGCT
HALLMARK_COMPLEMENT	-1.63008	0.000363566	TGCT
HALLMARK_PANCREAS_BETA_CELLS	-1.89507	0.000444417	TGCT
HALLMARK_UV_RESPONSE_DN	-1.60974	0.00465466	TGCT
HALLMARK_XENOBIOTIC_METABOLISM	-1.48418	0.00553263	TGCT
HALLMARK_ANGIOGENESIS	-1.72082	0.00559681	TGCT
HALLMARK_MITOTIC_SPINDLE	1.39875	0.00559681	TGCT
HALLMARK_KRAS_SIGNALING_DN	-1.50031	0.00585264	TGCT
HALLMARK_ESTROGEN_RESPONSE_EARLY	-1.44901	0.0106688	TGCT
HALLMARK_DNA_REPAIR	1.48262	0.0107391	TGCT
HALLMARK_ESTROGEN_RESPONSE_LATE	-1.41535	0.0107391	TGCT
HALLMARK_PEROXISOME	-1.33741	0.102778	TGCT
HALLMARK_INFLAMMATORY_RESPONSE	-1.26965	0.104541	TGCT
HALLMARK_NOTCH_SIGNALING	-1.3768	0.15123	TGCT
HALLMARK_HEDGEHOG_SIGNALING	-1.35867	0.187256	TGCT
HALLMARK_IL6_JAK_STAT3_SIGNALING	-1.22773	0.203983	TGCT
HALLMARK_APICAL_SURFACE	-1.24123	0.278614	TGCT
HALLMARK_TNFA_SIGNALING_VIA_NFKB	-1.12304	0.330329	TGCT
HALLMARK_GLYCOLYSIS	1.07091	0.436047	TGCT
HALLMARK_IL2_STAT5_SIGNALING	-1.07451	0.451485	TGCT
HALLMARK_APOPTOSIS	-1.02312	0.603117	TGCT
HALLMARK_PROTEIN_SECRETION	0.980137	0.676426	TGCT
HALLMARK_ANDROGEN_RESPONSE	-0.975165	0.720522	TGCT
HALLMARK_HYPOXIA	-0.972927	0.728853	TGCT
HALLMARK_FATTY_ACID_METABOLISM	-0.957555	0.728853	TGCT
HALLMARK_ALLOGRAFT_REJECTION	-0.931759	0.809376	TGCT
HALLMARK_P53_PATHWAY	0.931409	0.825581	TGCT
HALLMARK_REACTIVE_OXYGEN_SPECIES_PATHWAY	0.827818	0.969265	TGCT
HALLMARK_CHOLESTEROL_HOMEOSTASIS	-0.796694	0.992063	TGCT
HALLMARK_WNT_BETA_CATENIN_SIGNALING	-0.723358	1	TGCT
HALLMARK_ADIPOGENESIS	-0.81352	1	TGCT
HALLMARK_INTERFERON_GAMMA_RESPONSE	-0.787577	1	TGCT
HALLMARK_UV_RESPONSE_UP	-0.71605	1	TGCT
HALLMARK_INTERFERON_ALPHA_RESPONSE	0.678865	1	TGCT
HALLMARK_HEME_METABOLISM	-0.710808	1	TGCT
HALLMARK_TGF_BETA_SIGNALING	-0.528777	1	TGCT
HALLMARK_PI3K_AKT_MTOR_SIGNALING	-0.574115	1	TGCT
HALLMARK_EPITHELIAL_MESENCHYMAL_TRANSITION	-2.50493	5e-09	THCA
HALLMARK_TNFA_SIGNALING_VIA_NFKB	-2.06371	9.41581e-09	THCA
HALLMARK_P53_PATHWAY	-2.04788	1.44318e-08	THCA
HALLMARK_ESTROGEN_RESPONSE_LATE	-1.94957	2.00076e-07	THCA
HALLMARK_MYOGENESIS	-1.95569	3.60046e-07	THCA
HALLMARK_COAGULATION	-2.03357	7.99919e-07	THCA
HALLMARK_MITOTIC_SPINDLE	1.82183	5.35018e-06	THCA
HALLMARK_APOPTOSIS	-1.81974	9.48253e-05	THCA
HALLMARK_ALLOGRAFT_REJECTION	-1.65714	0.000138041	THCA
HALLMARK_APICAL_JUNCTION	-1.6633	0.000209481	THCA
HALLMARK_OXIDATIVE_PHOSPHORYLATION	-1.65735	0.00034436	THCA
HALLMARK_KRAS_SIGNALING_UP	-1.6517	0.000389208	THCA
HALLMARK_COMPLEMENT	-1.5846	0.00060928	THCA
HALLMARK_MYC_TARGETS_V1	-1.52111	0.0040484	THCA
HALLMARK_HYPOXIA	-1.49745	0.0040484	THCA
HALLMARK_INFLAMMATORY_RESPONSE	-1.48705	0.0040484	THCA
HALLMARK_IL2_STAT5_SIGNALING	-1.47371	0.00417083	THCA
HALLMARK_XENOBIOTIC_METABOLISM	-1.47772	0.00439825	THCA
HALLMARK_DNA_REPAIR	-1.56662	0.00455162	THCA
HALLMARK_GLYCOLYSIS	-1.42914	0.00669961	THCA
HALLMARK_ANGIOGENESIS	-1.65647	0.0132637	THCA
HALLMARK_G2M_CHECKPOINT	1.45671	0.0132637	THCA
HALLMARK_INTERFERON_GAMMA_RESPONSE	-1.31782	0.0344251	THCA
HALLMARK_UV_RESPONSE_UP	-1.38566	0.0498691	THCA
HALLMARK_PROTEIN_SECRETION	1.40267	0.0498691	THCA
HALLMARK_ESTROGEN_RESPONSE_EARLY	-1.27216	0.0512021	THCA
HALLMARK_HEDGEHOG_SIGNALING	1.50948	0.0569955	THCA
HALLMARK_KRAS_SIGNALING_DN	-1.31378	0.0571094	THCA
HALLMARK_CHOLESTEROL_HOMEOSTASIS	-1.38437	0.0576679	THCA
HALLMARK_ANDROGEN_RESPONSE	1.32974	0.10119	THCA
HALLMARK_ADIPOGENESIS	-1.20505	0.121655	THCA
HALLMARK_REACTIVE_OXYGEN_SPECIES_PATHWAY	-1.31663	0.125407	THCA
HALLMARK_MYC_TARGETS_V2	-1.28016	0.125696	THCA
HALLMARK_HEME_METABOLISM	1.19893	0.157029	THCA
HALLMARK_BILE_ACID_METABOLISM	1.21356	0.172545	THCA
HALLMARK_APICAL_SURFACE	-1.23349	0.206093	THCA
HALLMARK_IL6_JAK_STAT3_SIGNALING	-1.11294	0.327788	THCA
HALLMARK_SPERMATOGENESIS	1.07859	0.392428	THCA
HALLMARK_PANCREAS_BETA_CELLS	1.10087	0.401663	THCA
HALLMARK_UV_RESPONSE_DN	1.05991	0.426237	THCA
HALLMARK_E2F_TARGETS	1.03439	0.435393	THCA
HALLMARK_PI3K_AKT_MTOR_SIGNALING	1.03692	0.439041	THCA
HALLMARK_INTERFERON_ALPHA_RESPONSE	-0.986629	0.576227	THCA
HALLMARK_PEROXISOME	-0.964518	0.628192	THCA
HALLMARK_TGF_BETA_SIGNALING	-0.881049	0.788372	THCA
HALLMARK_NOTCH_SIGNALING	-0.820475	0.822068	THCA
HALLMARK_WNT_BETA_CATENIN_SIGNALING	0.778678	0.89503	THCA
HALLMARK_MTORC1_SIGNALING	0.79758	0.985074	THCA
HALLMARK_UNFOLDED_PROTEIN_RESPONSE	0.733278	0.989376	THCA
HALLMARK_FATTY_ACID_METABOLISM	-0.716637	0.99763	THCA
HALLMARK_E2F_TARGETS	-3.17454	7.14286e-10	THYM
HALLMARK_EPITHELIAL_MESENCHYMAL_TRANSITION	2.37389	7.14286e-10	THYM
HALLMARK_G2M_CHECKPOINT	-2.75032	7.14286e-10	THYM
HALLMARK_MYC_TARGETS_V1	-2.83379	7.14286e-10	THYM
HALLMARK_OXIDATIVE_PHOSPHORYLATION	-2.56715	7.14286e-10	THYM
HALLMARK_TNFA_SIGNALING_VIA_NFKB	2.0775	7.14286e-10	THYM
HALLMARK_UV_RESPONSE_DN	2.14584	7.14286e-10	THYM
HALLMARK_MYC_TARGETS_V2	-2.5655	7.84406e-09	THYM
HALLMARK_DNA_REPAIR	-2.10481	1.49089e-08	THYM
HALLMARK_INFLAMMATORY_RESPONSE	1.80691	5.95051e-07	THYM
HALLMARK_ESTROGEN_RESPONSE_EARLY	1.76306	4.11719e-06	THYM
HALLMARK_KRAS_SIGNALING_UP	1.76128	4.20082e-06	THYM
HALLMARK_ANGIOGENESIS	2.07985	5.82126e-06	THYM
HALLMARK_COAGULATION	1.75325	4.71017e-05	THYM
HALLMARK_ALLOGRAFT_REJECTION	-1.58533	0.000140677	THYM
HALLMARK_MYOGENESIS	1.63673	0.000145186	THYM
HALLMARK_APICAL_JUNCTION	1.62161	0.00020189	THYM
HALLMARK_MTORC1_SIGNALING	-1.54263	0.000339065	THYM
HALLMARK_TGF_BETA_SIGNALING	1.79687	0.000498361	THYM
HALLMARK_HEDGEHOG_SIGNALING	1.74862	0.00303816	THYM
HALLMARK_SPERMATOGENESIS	-1.5156	0.00307929	THYM
HALLMARK_PROTEIN_SECRETION	1.58472	0.00389389	THYM
HALLMARK_IL2_STAT5_SIGNALING	1.45816	0.00701057	THYM
HALLMARK_HYPOXIA	1.42701	0.0131636	THYM
HALLMARK_NOTCH_SIGNALING	1.5818	0.0223138	THYM
HALLMARK_IL6_JAK_STAT3_SIGNALING	1.45166	0.0268737	THYM
HALLMARK_ANDROGEN_RESPONSE	1.33483	0.0951992	THYM
HALLMARK_P53_PATHWAY	1.28919	0.107573	THYM
HALLMARK_INTERFERON_GAMMA_RESPONSE	1.23762	0.148909	THYM
HALLMARK_REACTIVE_OXYGEN_SPECIES_PATHWAY	-1.26911	0.148909	THYM
HALLMARK_ADIPOGENESIS	-1.07229	0.17335	THYM
HALLMARK_COMPLEMENT	1.21059	0.183521	THYM
HALLMARK_ESTROGEN_RESPONSE_LATE	1.19558	0.190846	THYM
HALLMARK_MITOTIC_SPINDLE	-1.11117	0.194055	THYM
HALLMARK_APICAL_SURFACE	1.23051	0.241261	THYM
HALLMARK_PI3K_AKT_MTOR_SIGNALING	-1.11506	0.277165	THYM
HALLMARK_CHOLESTEROL_HOMEOSTASIS	1.18838	0.277165	THYM
HALLMARK_APOPTOSIS	1.13935	0.277165	THYM
HALLMARK_FATTY_ACID_METABOLISM	-1.03552	0.429901	THYM
HALLMARK_KRAS_SIGNALING_DN	1.06214	0.429901	THYM
HALLMARK_WNT_BETA_CATENIN_SIGNALING	1.06272	0.43756	THYM
HALLMARK_XENOBIOTIC_METABOLISM	1.01814	0.524175	THYM
HALLMARK_HEME_METABOLISM	0.966698	0.63807	THYM
HALLMARK_BILE_ACID_METABOLISM	0.865889	0.821731	THYM
HALLMARK_INTERFERON_ALPHA_RESPONSE	0.862295	0.821731	THYM
HALLMARK_PEROXISOME	-0.899362	0.834735	THYM
HALLMARK_PANCREAS_BETA_CELLS	-0.825693	0.877193	THYM
HALLMARK_UNFOLDED_PROTEIN_RESPONSE	-0.832925	0.948879	THYM
HALLMARK_GLYCOLYSIS	0.779808	0.948879	THYM
HALLMARK_UV_RESPONSE_UP	0.698367	0.984234	THYM
HALLMARK_E2F_TARGETS	3.24081	1.66667e-09	UCEC
HALLMARK_G2M_CHECKPOINT	3.22173	1.66667e-09	UCEC
HALLMARK_MITOTIC_SPINDLE	2.7395	1.66667e-09	UCEC
HALLMARK_MYOGENESIS	-2.0659	4.26674e-07	UCEC
HALLMARK_ALLOGRAFT_REJECTION	-1.98551	3.44495e-06	UCEC
HALLMARK_COAGULATION	-2.03311	3.06358e-05	UCEC
HALLMARK_XENOBIOTIC_METABOLISM	-1.87223	3.06358e-05	UCEC
HALLMARK_MTORC1_SIGNALING	1.85015	4.90248e-05	UCEC
HALLMARK_PROTEIN_SECRETION	2.02703	5.03209e-05	UCEC
HALLMARK_INTERFERON_GAMMA_RESPONSE	-1.56319	0.00730503	UCEC
HALLMARK_ANDROGEN_RESPONSE	1.68032	0.00847993	UCEC
HALLMARK_P53_PATHWAY	-1.52303	0.00905154	UCEC
HALLMARK_UV_RESPONSE_DN	1.55608	0.0135345	UCEC
HALLMARK_KRAS_SIGNALING_UP	-1.46126	0.019103	UCEC
HALLMARK_COMPLEMENT	-1.50029	0.0214401	UCEC
HALLMARK_REACTIVE_OXYGEN_SPECIES_PATHWAY	-1.57369	0.0357708	UCEC
HALLMARK_ESTROGEN_RESPONSE_LATE	-1.39757	0.0481043	UCEC
HALLMARK_MYC_TARGETS_V1	1.34578	0.0642073	UCEC
HALLMARK_OXIDATIVE_PHOSPHORYLATION	-1.33062	0.0834	UCEC
HALLMARK_HEME_METABOLISM	1.29103	0.0937397	UCEC
HALLMARK_INTERFERON_ALPHA_RESPONSE	-1.38799	0.0992209	UCEC
HALLMARK_KRAS_SIGNALING_DN	-1.33668	0.0992209	UCEC
HALLMARK_UNFOLDED_PROTEIN_RESPONSE	1.31455	0.109592	UCEC
HALLMARK_SPERMATOGENESIS	1.4476	0.109592	UCEC
HALLMARK_FATTY_ACID_METABOLISM	-1.22565	0.192982	UCEC
HALLMARK_PI3K_AKT_MTOR_SIGNALING	1.20932	0.194032	UCEC
HALLMARK_APICAL_JUNCTION	-1.1801	0.213675	UCEC
HALLMARK_PEROXISOME	-1.20475	0.239626	UCEC
HALLMARK_ADIPOGENESIS	-1.16529	0.239626	UCEC
HALLMARK_EPITHELIAL_MESENCHYMAL_TRANSITION	-1.15814	0.242527	UCEC
HALLMARK_TGF_BETA_SIGNALING	1.22706	0.269771	UCEC
HALLMARK_APOPTOSIS	-1.14201	0.269771	UCEC
HALLMARK_HYPOXIA	1.12812	0.269771	UCEC
HALLMARK_INFLAMMATORY_RESPONSE	-1.1089	0.319043	UCEC
HALLMARK_IL2_STAT5_SIGNALING	-1.0886	0.357143	UCEC
HALLMARK_ESTROGEN_RESPONSE_EARLY	-1.05575	0.450576	UCEC
HALLMARK_PANCREAS_BETA_CELLS	-1.05481	0.512017	UCEC
HALLMARK_BILE_ACID_METABOLISM	-1.00657	0.558284	UCEC
HALLMARK_DNA_REPAIR	-0.997481	0.599633	UCEC
HALLMARK_GLYCOLYSIS	0.988476	0.620438	UCEC
HALLMARK_APICAL_SURFACE	-0.972021	0.623053	UCEC
HALLMARK_CHOLESTEROL_HOMEOSTASIS	0.962787	0.623053	UCEC
HALLMARK_MYC_TARGETS_V2	0.936069	0.663282	UCEC
HALLMARK_WNT_BETA_CATENIN_SIGNALING	-0.906814	0.728288	UCEC
HALLMARK_ANGIOGENESIS	-0.855443	0.779693	UCEC
HALLMARK_IL6_JAK_STAT3_SIGNALING	-0.793596	0.916165	UCEC
HALLMARK_TNFA_SIGNALING_VIA_NFKB	0.857522	0.916165	UCEC
HALLMARK_UV_RESPONSE_UP	-0.818444	0.916165	UCEC
HALLMARK_HEDGEHOG_SIGNALING	0.673563	0.961672	UCEC
HALLMARK_NOTCH_SIGNALING	-0.638807	0.961672	UCEC
HALLMARK_INTERFERON_ALPHA_RESPONSE	-2.479	2.5e-09	UCS
HALLMARK_MYOGENESIS	2.5406	2.5e-09	UCS
HALLMARK_INTERFERON_GAMMA_RESPONSE	-1.94772	8.19611e-09	UCS
HALLMARK_COAGULATION	-2.15211	3.40881e-08	UCS
HALLMARK_APOPTOSIS	-1.78518	1.38238e-05	UCS
HALLMARK_P53_PATHWAY	-1.69415	2.49375e-05	UCS
HALLMARK_OXIDATIVE_PHOSPHORYLATION	-1.64439	3.23279e-05	UCS
HALLMARK_ESTROGEN_RESPONSE_LATE	-1.5198	0.000345825	UCS
HALLMARK_KRAS_SIGNALING_DN	1.60118	0.000470662	UCS
HALLMARK_EPITHELIAL_MESENCHYMAL_TRANSITION	-1.51237	0.00063431	UCS
HALLMARK_DNA_REPAIR	-1.53179	0.00188834	UCS
HALLMARK_REACTIVE_OXYGEN_SPECIES_PATHWAY	-1.79017	0.00454892	UCS
HALLMARK_CHOLESTEROL_HOMEOSTASIS	-1.60113	0.00855943	UCS
HALLMARK_MITOTIC_SPINDLE	1.43625	0.0150923	UCS
HALLMARK_ADIPOGENESIS	-1.27975	0.0209457	UCS
HALLMARK_COMPLEMENT	-1.29401	0.022708	UCS
HALLMARK_XENOBIOTIC_METABOLISM	-1.19535	0.0888562	UCS
HALLMARK_ALLOGRAFT_REJECTION	-1.17854	0.106536	UCS
HALLMARK_GLYCOLYSIS	-1.15134	0.124148	UCS
HALLMARK_SPERMATOGENESIS	1.26969	0.220507	UCS
HALLMARK_TNFA_SIGNALING_VIA_NFKB	-1.12564	0.220507	UCS
HALLMARK_NOTCH_SIGNALING	1.2949	0.329069	UCS
HALLMARK_HYPOXIA	-1.1047	0.348468	UCS
HALLMARK_IL2_STAT5_SIGNALING	-1.07047	0.405189	UCS
HALLMARK_WNT_BETA_CATENIN_SIGNALING	1.2019	0.41184	UCS
HALLMARK_UV_RESPONSE_UP	-1.08855	0.458477	UCS
HALLMARK_APICAL_JUNCTION	1.1024	0.499245	UCS
HALLMARK_ANGIOGENESIS	-1.10979	0.511344	UCS
HALLMARK_HEDGEHOG_SIGNALING	1.1348	0.511344	UCS
HALLMARK_ESTROGEN_RESPONSE_EARLY	1.08242	0.511344	UCS
HALLMARK_PEROXISOME	-1.0524	0.520833	UCS
HALLMARK_APICAL_SURFACE	-1.04952	0.520833	UCS
HALLMARK_G2M_CHECKPOINT	1.06118	0.539075	UCS
HALLMARK_TGF_BETA_SIGNALING	-1.02446	0.550528	UCS
HALLMARK_HEME_METABOLISM	0.99045	0.715035	UCS
HALLMARK_KRAS_SIGNALING_UP	0.976672	0.739388	UCS
HALLMARK_PI3K_AKT_MTOR_SIGNALING	0.909284	0.850726	UCS
HALLMARK_UV_RESPONSE_DN	0.906919	0.850726	UCS
HALLMARK_FATTY_ACID_METABOLISM	-0.941867	0.897852	UCS
HALLMARK_PANCREAS_BETA_CELLS	-0.866556	0.897852	UCS
HALLMARK_IL6_JAK_STAT3_SIGNALING	0.846671	0.897852	UCS
HALLMARK_MYC_TARGETS_V1	-0.938501	0.898931	UCS
HALLMARK_INFLAMMATORY_RESPONSE	0.805301	1	UCS
HALLMARK_E2F_TARGETS	0.788695	1	UCS
HALLMARK_BILE_ACID_METABOLISM	0.721595	1	UCS
HALLMARK_MTORC1_SIGNALING	0.687106	1	UCS
HALLMARK_PROTEIN_SECRETION	0.624936	1	UCS
HALLMARK_MYC_TARGETS_V2	0.482706	1	UCS
HALLMARK_ANDROGEN_RESPONSE	0.581614	1	UCS
HALLMARK_UNFOLDED_PROTEIN_RESPONSE	0.539356	1	UCS
HALLMARK_INTERFERON_GAMMA_RESPONSE	1.46991	0.00086591	UVM
HALLMARK_ALLOGRAFT_REJECTION	1.45766	0.00086591	UVM
HALLMARK_G2M_CHECKPOINT	1.43293	0.00330994	UVM
HALLMARK_KRAS_SIGNALING_UP	1.39399	0.00330994	UVM
HALLMARK_MITOTIC_SPINDLE	1.3798	0.00812744	UVM
HALLMARK_PROTEIN_SECRETION	1.47886	0.00814992	UVM
HALLMARK_INFLAMMATORY_RESPONSE	1.35867	0.0124995	UVM
HALLMARK_IL6_JAK_STAT3_SIGNALING	1.44441	0.026938	UVM
HALLMARK_E2F_TARGETS	1.29257	0.0318214	UVM
HALLMARK_TNFA_SIGNALING_VIA_NFKB	1.29696	0.0337539	UVM
HALLMARK_MYC_TARGETS_V2	-1.51573	0.0337539	UVM
HALLMARK_INTERFERON_ALPHA_RESPONSE	1.36605	0.0376473	UVM
HALLMARK_MTORC1_SIGNALING	1.25608	0.121275	UVM
HALLMARK_ANDROGEN_RESPONSE	1.27781	0.181269	UVM
HALLMARK_COMPLEMENT	1.21031	0.189	UVM
HALLMARK_IL2_STAT5_SIGNALING	1.20252	0.194062	UVM
HALLMARK_UV_RESPONSE_DN	1.20723	0.267353	UVM
HALLMARK_APICAL_SURFACE	-1.21347	0.290766	UVM
HALLMARK_SPERMATOGENESIS	1.14908	0.415721	UVM
HALLMARK_REACTIVE_OXYGEN_SPECIES_PATHWAY	-1.0154	0.879527	UVM
HALLMARK_BILE_ACID_METABOLISM	1.01682	0.969131	UVM
HALLMARK_TGF_BETA_SIGNALING	0.998564	0.999	UVM
HALLMARK_PI3K_AKT_MTOR_SIGNALING	0.975203	0.999	UVM
HALLMARK_APOPTOSIS	0.975439	0.999	UVM
HALLMARK_HEME_METABOLISM	0.951051	0.999	UVM
HALLMARK_PEROXISOME	0.934865	0.999	UVM
HALLMARK_PANCREAS_BETA_CELLS	0.89332	0.999	UVM
HALLMARK_ANGIOGENESIS	0.875524	0.999	UVM
HALLMARK_CHOLESTEROL_HOMEOSTASIS	0.823943	0.999	UVM
HALLMARK_FATTY_ACID_METABOLISM	0.870822	0.999	UVM
HALLMARK_UNFOLDED_PROTEIN_RESPONSE	0.805083	0.999	UVM
HALLMARK_NOTCH_SIGNALING	0.713996	0.999	UVM
HALLMARK_ESTROGEN_RESPONSE_LATE	0.835695	0.999	UVM
HALLMARK_HEDGEHOG_SIGNALING	0.71442	0.999	UVM
HALLMARK_UV_RESPONSE_UP	0.7463	0.999	UVM
HALLMARK_GLYCOLYSIS	0.74361	0.999	UVM
HALLMARK_EPITHELIAL_MESENCHYMAL_TRANSITION	0.737372	0.999	UVM
HALLMARK_HYPOXIA	0.714828	0.999	UVM
HALLMARK_MYC_TARGETS_V1	0.698672	0.999	UVM
HALLMARK_ESTROGEN_RESPONSE_EARLY	0.688744	0.999	UVM
HALLMARK_WNT_BETA_CATENIN_SIGNALING	0.491793	0.999	UVM
HALLMARK_COAGULATION	0.594228	0.999	UVM
HALLMARK_XENOBIOTIC_METABOLISM	0.673233	0.999	UVM
HALLMARK_P53_PATHWAY	0.606841	0.999	UVM
HALLMARK_OXIDATIVE_PHOSPHORYLATION	0.604932	0.999	UVM
